# Scale-Dependent Coherence of Terrestrial Vertebrate Biodiversity with Environment

Conor P. B. O'Malley<sup>a,1</sup>, Gareth G. Roberts<sup>a</sup>, Philip D. Mannion<sup>b</sup>, Jan Hackel<sup>c</sup>, and Yanghua Wang<sup>a</sup>

<sup>a</sup>Department of Earth Science & Engineering, Imperial College London, Royal School of Mines, Prince Consort Road, London SW7 2BP, UK; <sup>b</sup>Department of Earth Sciences, University College London, London WC1E 6BT, UK; <sup>c</sup>Department of Trait Diversity and Function, Royal Botanic Gardens, Kew, London TW9 3AE, UK

This manuscript was compiled on January 21, 2022

**Disentangling contributions from co-varying environmental variables is likely crucial for understanding the drivers of biodiversity patterns, including latitudinal diversity gradients. Here, we describe a novel use of wavelet power spectra to separate wavelength-dependent trends as a function of position on Earth's surface. Spectra reveal scale- and location-dependent coherence between species richness and topography ( $E$ ), mean annual precipitation ( $Pn$ ), temperature ( $Tm$ ) and annual temperature range ( $\Delta T$ ). Greater than 97% of species richness of carnivorans, bats, songbirds, hummingbirds and amphibians (which encompass  $\sim \frac{2}{3}$  of terrestrial vertebrate species) are generated at large scales, i.e. wavelengths  $\gtrsim 10^3$  km. 30–69% is generated at scales  $\gtrsim 10^4$  km. At these scales, richness across the Americas, the longest transect examined, tends to be highly coherent and anti-phase with  $E$  and  $\Delta T$  (i.e. one high, the other low), and in-phase with  $Pn$  and  $Tm$  (e.g. both high or both low). Coherence between carnivorans and  $\Delta T$  is low across all scales, which suggests insensitivity to seasonal temperature variations. By contrast, amphibian richness is strongly anti-correlated with  $\Delta T$  at large scales. At scales  $\lesssim 10^3$  km, examined taxa, except carnivorans, show highest richness within the tropics. Terrestrial plateaux (e.g. Colorado, Altiplano) are foci of high coherence between carnivorans and  $E$  at scales  $\sim 10^3$  km, which is consistent with the notion that large-scale tectonic processes contribute to local biodiversity, even for carnivorans. These results are similar to those obtained from transects across Africa, Eurasia, Australia and average global latitudinal transects. They highlight scale-dependent sensitivities of mammal, bird and amphibian populations to local environments and global climate.**

Biodiversity | Topography | Climate | Spectral Analysis

**B**iological diversity is critical to many basic human needs, including health, food, water and shelter. It also plays an important role in moderating physical and chemical processes in natural environments (1–4). Quantifying links between environment and biodiversity is crucial for understanding the response of ecosystems to climatic and physiographic change, and for conservation efforts (5–7). Many extrinsic processes postulated to control biodiversity (e.g. climate) are rapidly changing; therefore quantifying the strength of relationships between them is a pressing concern (8).

Environmental variables and species richness exhibit variance in space across a range of scales. However, it is unclear whether coherence between variables is uniform across all scales. As such, developing methodologies that can disentangle scale and location from biotic and environmental data to identify correlations is crucial. Here, we focus on quantifying coherence between species richness of continental vertebrate taxa and elevation, precipitation, temperature, and annual temperature range, which are postulated to drive biodiversity (e.g. 9, 10). We do so by mapping coherence between biotic and environmental signals as a function of scale and location

using wavelet spectral analyses. Unlike in spatial regression studies, these analyses inherently disentangle scale-dependent effects, and identify strength of correlation between variables at individual scales.

Identifying links between biodiversity and environment has recently become significantly more tractable for three reasons. First, global patterns of species richness have been estimated with unprecedented detail, from horizontal scales as broad as continents, to those as fine as  $\sim 10$  km in wavelength (11–13). Second, values and variance of many environmental variables postulated to be responsible for determining distributions of species are now available globally at even higher resolution. Finally, wavelet spectral methods, which can identify the locations and scales at which signals (e.g. spatial series of taxa) are generated, as well as coherence and phase differences (offsets) between series such as species richness, topography and climate, are now established (see Materials and Methods; 14, 15). These kinds of analyses are key to understanding how the changing global climate will affect the distribution of biodiversity across Earth.

Figure 1a–f shows species richness per  $10 \times 10$  km cell for all mammals (Mammalia), carnivorans (Carnivora), bats (Chiroptera), songbirds (Passeriformes), hummingbirds (Trochilidae), and amphibians (Amphibia). These data reinforce well-known large-scale observations, e.g. the latitudinal diversity gradient (LDG), but also contain evidence of significant complexity across scales of interest, here wavelengths between

## Significance Statement

Understanding connections between environment and biodiversity is crucial for conservation, identifying causes of ecosystem stress, and predicting population responses to changing environments. Explaining biodiversity requires an understanding of how species richness and environment co-vary across different scales. Here, we apply wavelet power spectral analysis to terrestrial latitudinal transects, in order to identify scales and locations at which biodiversity is generated. Terrestrial species richness is found to be highly scale-dependent. Coherence with elevation, mean annual precipitation and temperature depends on scale and location. These results highlight the importance of global-scale climate for determining distributions of mammals, birds and amphibians. Smaller-scale climatic changes are increasingly important within the tropics, especially for groups such as bats, hummingbirds, and amphibians.

C.O. and G.R. designed the project, developed code, interpreted results and wrote the manuscript with contributions from P.M., Y.W., J.H.; C.O. performed the analyses and generated figures.

The authors declare no competing interests.

<sup>1</sup>To whom correspondence should be addressed. E-mail: conor.omalley19@imperial.ac.uk

10–10<sup>4</sup> km (16, 17). We examine species richness trends in this study, since it is the easiest biodiversity metric to calculate, having been done so for a wide range of taxa. Here, we focus on terrestrial taxa since terrestrial surface environmental conditions are best-mapped, as is terrestrial vertebrate biodiversity. Similar analysis is possible for marine taxa, plants etc., and for metrics other than species richness, for example range sizes, trophic interactions etc.

Latitudinal transects through terrestrial vertebrate richness data are shown in Figure 2. We focus on the Americas, where transects can be generated that encompass almost all of Earth’s latitudinal range (Figures 1 & 2: A–A’). Transects through data for Australia (B–B’), Africa (C–C’), Eurasia (D–D’) and global averages are shown in Supporting Information (Figures S7–S29). We have examined how uncertainties in species richness could contribute to uncertainties in calculated spectra and coherence by adding uniformly distributed (white) noise to transects before they are transformed into the spectral domain (Supporting Information Figure S5). Figures 1f–i and 2f–i show examples of maps and cross sections through elevation and climatic data from the ETOPO1 and CHELSA datasets, respectively (18, 19).

## Results and Discussion

Spectral analyses of American vertebrate species richness and environmental variables are shown in Figures 2 and 3. Figure 2 shows that highest spectral power,  $\phi$  ( $\propto z^2$ , where  $z$  is signal amplitude), is concentrated at largest scales for all taxa and environmental variables studied. From 96% to almost 100% of power resides at wavelengths  $>10^3$  km. 29–74% of power resides at wavelengths  $\gtrsim 10^4$  km. These results reinforce the notion that species richness is dominated by long wavelength, latitudinal, variability. A guide to scale-dependence and self-similarity of spatial series is the color of spectral noise that they possess. For example, red (Brownian) noise occurs when  $\phi \propto k^{-2}$ , where  $k$  is wavenumber or spatial frequency, proportional to 1/wavelength, indicating self-similarity. Pink noise occurs when  $\phi \propto k^{-1}$ , and white noise indicates that power is equal across all scales,  $\phi \propto 1$ .

Species richness tends to have a pink noise spectrum (see Supporting Information for slope fitting). Thereby, shorter wavelength features in species richness signals tend to have the lowest amplitudes and comprise relatively little (few %) of species richness signal at a particular location. Mammals and bats are better characterized by red noise at long wavelengths. This result implies self-similarity across scales, and that signal amplitudes decrease even more rapidly with decreasing wavelength than for other taxa. At wavelengths  $\gtrsim 10^3$  km, species richness power for amphibians is best characterized as blue noise, i.e.  $\phi \propto k^1$ . This trend is not observed along the entire transect, but indicates that short wavelength features can be increasingly important contributors to amphibian richness (see Figure 2f). A single spectral slope akin to pink noise can adequately fit the amphibian richness spectrum (see Supporting Information Figure S1f, p).

To assess the impact of uncertainties for these results, white noise was added to the amphibian transect in a systematic set of tests. These tests examined changes in calculated spectra when noise with maximum amplitudes of 10%, 50% and 100% of the standard deviation of the original signal’s amplitudes (24 species per pixel) was added to the transect prior to trans-

formation. These tests included adding noise at wavelengths  $\lesssim 100$ ,  $\lesssim 1000$  and  $\lesssim 10,000$  km (Supporting Information Figure S5). As expected, these tests indicated that spectral power is least likely to be well constrained at short wavelengths. Nonetheless, these tests indicate that even high amplitude uniformly distributed noise does not significantly change the overall spectral characteristics of terrestrial species richness.

Although almost no power is concentrated below wavelengths of  $\sim 100$  km for any of the taxa examined here, there are some parts of some wavelet transforms which show increased power in the range  $\sim 300$ – $1000$  km. This deviation, away from a broadly monotonic decrease in power towards shorter wavelengths, is driven principally by species richness within tropical latitudes, and is especially prominent for songbirds, hummingbirds and amphibians (Figure 2h, j, l). Supporting Information Figure S3a–f shows that at wavelengths  $\gtrsim 1000$  km, there is no notable difference between power in species richness within or outside the tropics. However, at wavelengths  $\lesssim 1000$  km, there is significantly greater power for regions within the tropics. This trend arises since power spectral slopes remain close to  $-2$  at shorter wavelengths outside of the tropics (i.e. red noise; Supporting Information Figure S3), before increasing to be closer to  $-1$  (i.e. pink noise). We suggest that these results are consistent with the concept that topography in tropical regions can generate higher species richness towards the equator via the increased effectiveness of relief at isolating species (20). We find the effect has a greatest impact on species richness power of hummingbirds and amphibians; the impact on bats and songbirds richness appears to be more modest. Tropical increases in species richness of carnivorans, and mammals more generally, are much more subdued (Supporting Information Figure S3).

Elevation transects exhibit red and pink noise spectral characteristics at wavelengths  $\gtrsim 10^3$  km and  $\lesssim 10^3$  km, respectively, which we note is similar to distance-averaged power from wavelet transforms of longitudinal river profiles and other topographic transects (21, 22, Supporting Information Figures S1g, S1q, S2g, S2q). Precipitation rate, temperature and annual temperature range can also be characterized as red and pink noise (Figures S1h–j, r–t & S2h–j, r–t). Similar results are obtained for transects through Africa, Eurasia and Australia, as well as across global, latitudinally-averaged sections (see Supporting Information).

**Coherence between Taxa and Environment.** Visual inspection of Figure 2 indicates that there is strong, location- and scale-dependent, similarity between the wavelet transforms of transects through species richness and environmental variables. To quantify the strength of these relationships we calculate cross wavelet power, which identifies co-located high amplitudes in the location-scale domain, and wavelet coherence (see Materials and Methods). In the main manuscript, we show results from carnivorans (which are similar to those for mammals generally), and amphibians (which are similar to those for bats, songbirds and hummingbirds). See Supporting Information Figure S3 for analysis of those other taxa.

Figure 3a shows cross wavelet power between species richness of carnivorans along transect A–A’ and elevation. Almost no short-wavelength ( $< 10^3$  km) features are coherent above a 90% confidence limit (see Materials and Methods). These short wavelength regions contain almost no cross wavelet power; 94% of all cross power is in the region of high coher-

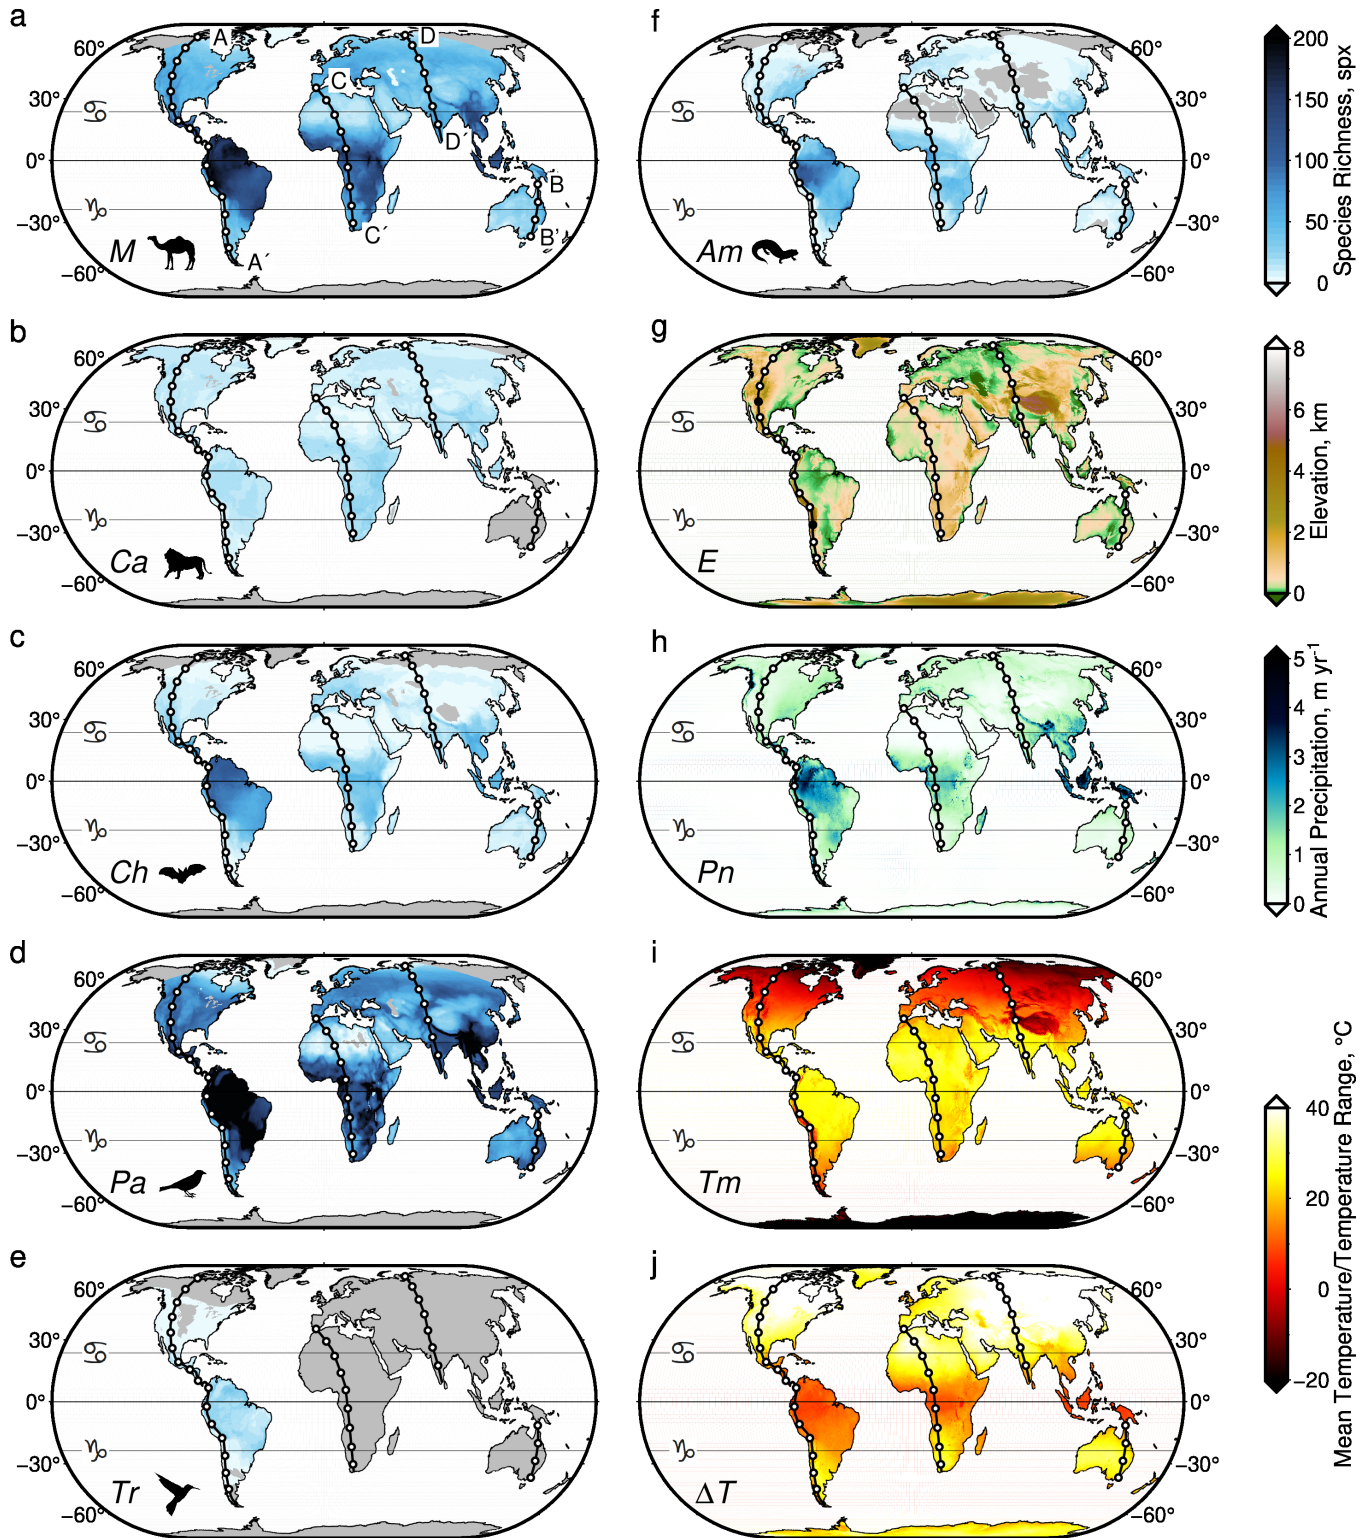

**Fig. 1.** (a)–(f) Global patterns of species richness for all Mammalia (*M*), Carnivora (*Ca*), Chiroptera (*Ch*), Passeriformes (*Pa*), Trochilidae (*Tr*), Amphibia (*Am*); *spx* = species per 10 × 10 km pixel (12); horizontal lines = Tropics of Cancer (northern), Capricorn (southern), and Equator; A–A' = transect through Americas investigated here; B–B', C–C', D–D' = transects investigated in Supporting Information. (g) Elevation (*E*) from ETOPO1 global model with horizontal resolution of 1 arc-minute (18); filled circles on A–A' = Colorado Plateau/Mexican Highlands and Andean Altiplano. (h)–(j) Mean annual precipitation rate (*Pn*), temperature (*Tm*), and temperature range ( $\Delta T$ ) from 1981–2010 (19).

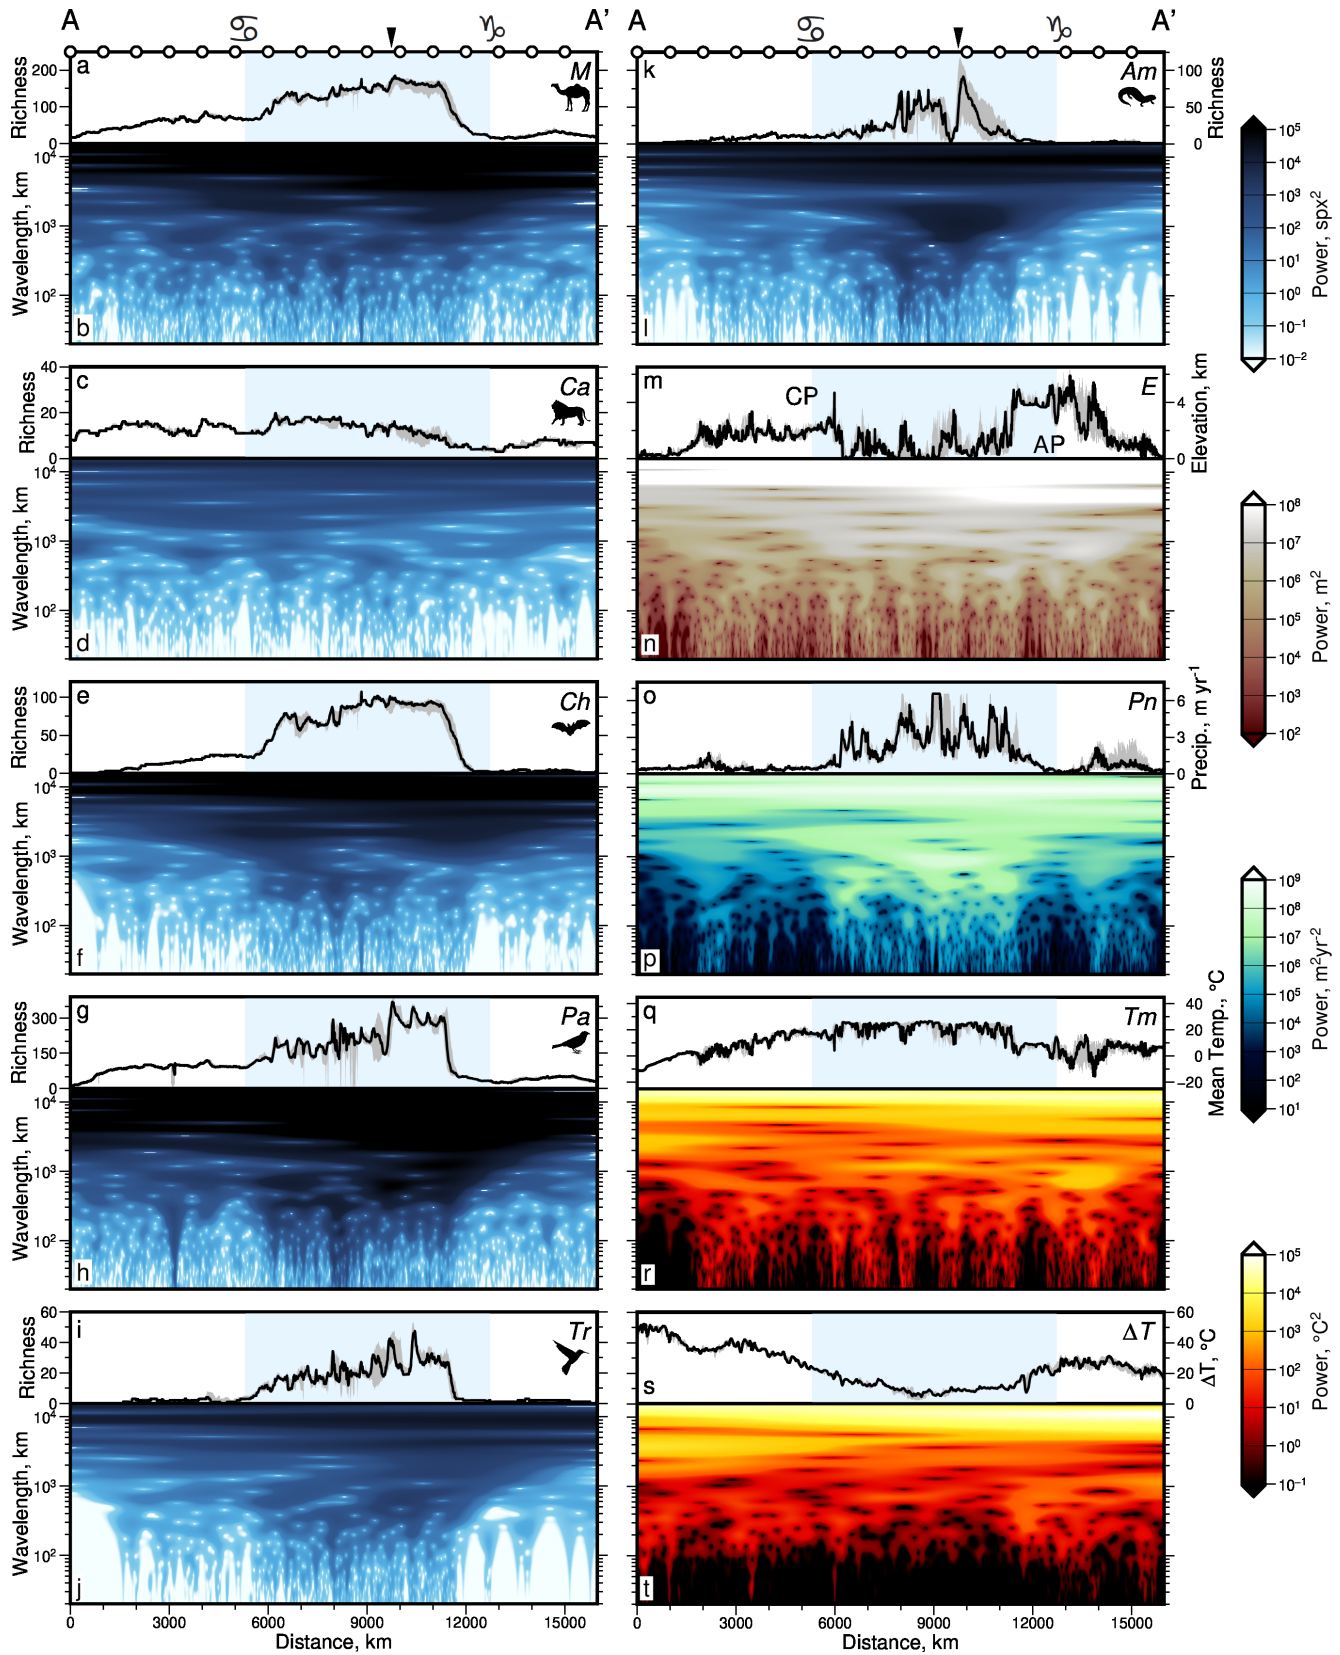

**Fig. 2.** (a) Black line = species richness of Mammalia (*M*) along transect A–A′; gray bands = 100 km wide swaths centred on A–A′; blue bands = tropical latitudes; white circles are shown every 1000 km, see transect A–A′ in Figure 1; black arrow and symbols above top axis = Equator and tropics as in Figure 1. (b) Continuous wavelet transform of Mammalia spatial series (black line in panel a). Colors = spectral power as a function of location and scale (wavelength); spx = species per pixel. (c)–(t) As (a)–(b) but for Carnivora (*Ca*), Chiroptera (*Ch*), Passeriformes (*Pa*), Trochilidae (*Tr*), Amphibia (*Am*), elevation (*E*), mean annual precipitation rate (*Pn*), temperature (*Tm*) and temperature range ( $\Delta T$ ) along transect A–A′ (12, 18, 19). See Supporting Information for results for transects B–B′, C–C′, D–D′ and average global latitudinal transect.

ence colored on Figure 3a, which accounts for 30% of the location-scale domain. 79% of the area of the cross wavelet spectrum that is significantly coherent resides at wavelengths  $\gtrsim 10^3$  km. Distance-averaged cross wavelet power for all parts of the power spectrum, not just those parts which are coherent above the 90% significance threshold, is shown to the right of each panel, on a logarithmic scale. Full, unmasked, plots of cross wavelet power are shown in Supporting Information Figure S4. Distance-averaged cross wavelet power between all taxa and environmental variables studied is shown in Figure S3g–ad.

Cross wavelet power between amphibians and elevation is also highest at long wavelengths, although overall there is a smaller proportion of the two signals that is coherent: 78% of the plot region is masked in Figure 3e. Only a small part of the cross wavelet transform for amphibians and elevation is coherent below wavelengths of  $\sim 5000$  km, and that part lies near the centre of the transect, i.e. within the tropics. Distance-averaged power outside the tropics, plotted to the right of Figure 3e, is an order of magnitude lower than within the tropics, especially at shorter wavelengths. This observation is in contrast to cross power between species richness of carnivorans and elevation, where there is almost no difference within the tropics and outside the tropics, across all scales. These results indicate that carnivorans are less affected by “mountain passes” (*sensu* Janzen (20)) in the tropics, compared with amphibians (cf. 10, 23–25). Carnivoran species richness is most coherent with elevation and mean annual temperature at wavelengths  $\sim 10^3$  km atop terrestrial plateaux (e.g. Rocky-Mountains-Colorado Plateau and Altiplano, between 4000–7000 km and 13,000–14,000 km distance along transect A–A’, respectively; Figures 1–3). An obvious interpretation is the local importance of tectonics for determining biodiversity (10).

Coherent cross wavelet power between species richness of carnivorans and amphibians, mean annual precipitation rate, temperature and annual temperature range is shown in Figure 3b–d, f–h. Cross power between amphibian species richness and precipitation rate, temperature, and temperature range is high within the tropics, whereas those differences are absent or reduced for carnivorans. Furthermore, for these three climatic variables, there is much weaker coherence with carnivoran species richness. Carnivorans appear less sensitive to changes in those variables compared with amphibians. Calculated phase indicates long-wavelength anticorrelation between elevation and species richness for both carnivorans and amphibians (left-pointing arrows in Figure 3a and e; phase angle,  $\alpha = \pi$ ; see Materials and Methods). Highly coherent long-wavelength anticorrelation between amphibian species richness and annual temperature range is also observed across the entire transect. Highly coherent, long-wavelength cross power between precipitation rate or temperature and species richness of both carnivorans and amphibians is in phase, i.e. there is positive correlation at these scales. This result is in agreement with the idea that faster diversification rates drive species richness, since it suggests that both taxa benefit from increased energy and high productivity associated with greater availability of heat and water (cf. 26).

**Global and Local Species Richness and Environment.** These American results can be compared to transects from Australia, Eurasia and Africa. For Australia, similar trends in power

spectral slopes, distance-averaged power and cross wavelet power are observed (Figure 1: B–B’; Supporting Information Figures S8–S10). However, there is almost no difference in power or cross power between tropical regions and regions outside the tropics. We note, however, that the transect does not include the entirety of the tropics. Signals are mostly coherent at wavelengths  $\gtrsim 10^3$  km, and the same pattern of correlation/anticorrelation is observed with climatic variables (Supporting Information Figure S11). In Africa, songbirds and amphibians have greater species richness power within the tropics but the differences are not as stark as for the Americas (Figure 1: C–C’; Supporting Information Figure S16a–f). This result may reflect differences in Cenozoic paleoclimatic history between Africa and the Americas (27). The greatest difference between cross power within the tropics and outside the tropics is for precipitation rate, suggesting that water availability controls species richness for all African taxa studied here. Wavelet coherence indicates that, across Africa, carnivoran species richness does not correlate with environmental variables, whereas species richness of amphibians is strongly positively correlated with precipitation rate at long wavelengths (28). Anticorrelation is observed between amphibian species richness and temperature across Africa. Results for Eurasia are dominated by the presence of the Tibetan Plateau, and the low proportion of the transect within tropical latitudes (Figure 1: D–D’; Supporting Information Figures S19–S24). Similar trends to the Americas are observed, albeit with generally lower cross power and coherence.

Mean terrestrial values of each variable across all latitudes globally were transformed into the location-scale domain. Distance-averaged wavelet power spectra of the resulting transects have spectral slopes between  $-2$  and  $-1$  (red to pink noise), reflecting the importance of long-wavelength trends. Species richness power for all taxa except Mammalia and Carnivora is at least an order of magnitude lower outside of tropical latitudes, at wavelengths  $\lesssim 3000$  km, consistent with results obtained from transforming the American transect (Figures 2 and 3). This result suggests that the increase in species richness power at short wavelengths may be a global phenomenon reflecting sensitivity of tropical species to local climatic effects.

**Scale-Dependent Drivers of Biodiversity.** A principal result of this study is that terrestrial species richness tends to be most coherent with topography, precipitation and temperature at long wavelengths ( $> 10^3$  km). These results indicate that large-scale variation in tectonic and climatic processes play a governing role in generating the LDG (29). However, our results also indicate that the distribution of taxa, and their coherence and phase with environmental variables, is highly location- and scale-dependent. For example, whereas carnivorans and amphibians are in phase and coherent with mean annual precipitation and temperature at wavelengths  $> 10^4$  km, that is not true at smaller scales (i.e. shorter wavelengths). Significant deviations from the LDG indicate that external variables such as elevation, climatic patterns and tectonic history, play important roles in determining biodiversity at specific locations and scales (e.g. 27, 30–34).

Spectral analyses highlight the importance of the tropics for biodiversity, in particular for amphibians where local changes in elevation and mean annual temperature (but not annual temperature range) are highly coherent with species richness.

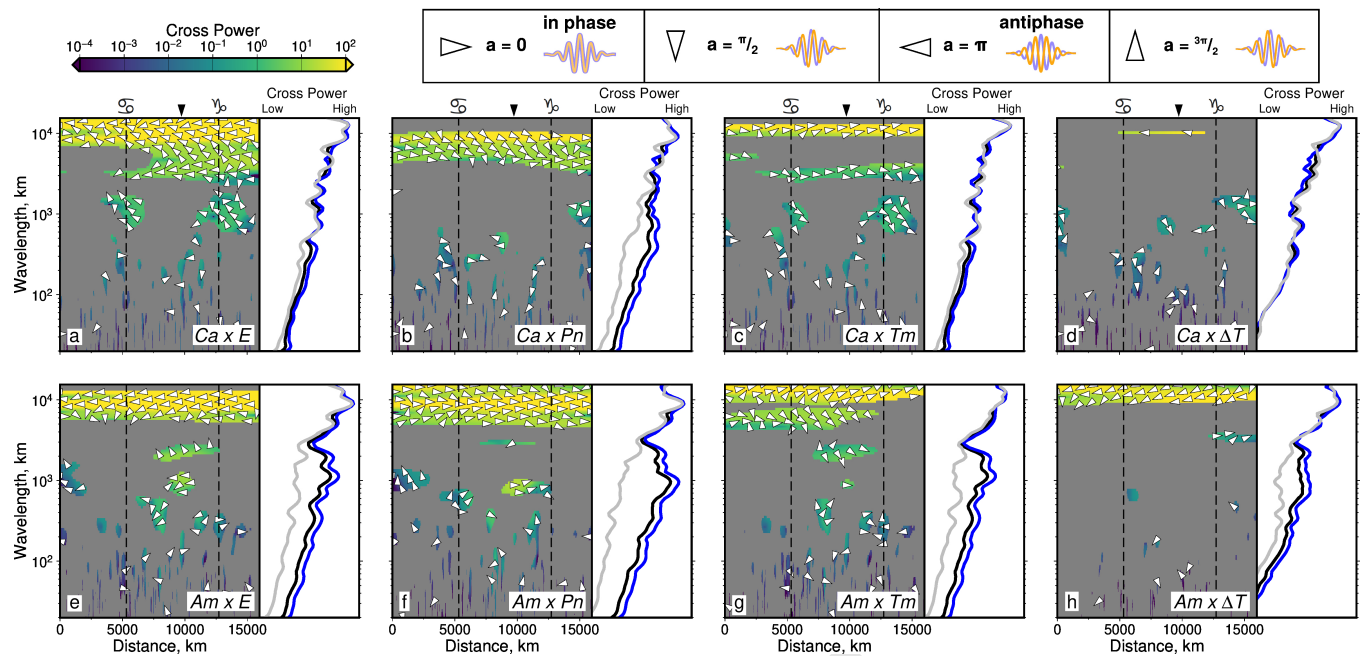

**Fig. 3.** (a) Comparison of Carnivora (*Ca*) and elevation (*E*) as a function of location and scale along transect A–A' (Figures 1–2). Colors = cross wavelet power; yellow = co-located large (positive or negative) amplitude signals. Gray masks regions with coherence below 90% significance level (see body text, Materials and Methods). Arrows = phase difference between spatial series: right/left pointing = in-phase/anti-phase (see guide above panels b–d). Black arrow and symbols above plot = Equator and tropics, as in Figure 1. Side panel: black/blue/gray lines = distance-averaged cross wavelet power of all/tropical/non-tropical latitudes (see Figure 2). High cross power = large co-located amplitudes in the two spatial series. (b)–(d) Comparison of Carnivora and mean annual precipitation rate (*Pn*), temperature (*Tm*) and annual temperature range ( $\Delta T$ ). (e)–(h) Comparison of amphibian species richness and same environmental variables as panels a–d.

292 These results are consistent with the idea that increased resource  
 293 availability at the tropics may generate higher primary  
 294 productivity, supporting a greater number of individuals within  
 295 a given area (i.e. higher carrying capacity), and therefore a  
 296 greater number of different species (e.g. 35–38). Our results  
 297 support the suggestion that elevated topography at the tropics  
 298 is more likely to result in increased species diversity when  
 299 compared to higher latitudes (20, 39). However, this trend  
 300 is not uniformly observed across taxa and for all continents.  
 301 Species richness of carnivorans, for example, has no signif-  
 302 icant coherence with elevation or temperature range in the  
 303 tropics, which suggests that this group is largely unaffected  
 304 by the challenges posed by tropical mountain ranges. Power  
 305 spectral slopes for such taxa are steeper (more negative) at  
 306 shorter wavelengths, whereas more environmentally-sensitive  
 307 taxa, such as hummingbirds and amphibians, have shallower  
 308 spectral slopes at longer wavelengths within tropical latitudes.

309 Cross wavelet power and coherence indicate that species  
 310 richness is decoupled from short wavelength ( $\lesssim 10^3$  km)  
 311 changes in elevation, temperature, annual temperature range  
 312 and precipitation at nearly all locations, except for certain taxa  
 313 within the tropics. Locally, uplifted topography can be highly  
 314 coherent with species richness. Trends across the Americas are  
 315 reflected in global, latitudinally-averaged, transects and for  
 316 other continents. In general, the species richness of taxa such  
 317 as hummingbirds and amphibians is strongly and positively  
 318 correlated with precipitation rate and temperature, except  
 319 in Africa, where high temperatures may limit availability of  
 320 water. Crucially, these results could be used to predict the  
 321 changes in biodiversity that could arise from different future  
 322 Earth climate change scenarios.

323 In summary, wavelet power spectral analysis provides in-

324 sight into the coherence between species richness and envi-  
 325 ronmental variables. Species richness is shown to vary as a  
 326 function of location and scale. Comparisons with topogra-  
 327 phy, temperature and precipitation show that species richness  
 328 tends to be highly coherent with external forcing at large scales  
 329 (wavelengths  $> 10^4$  km). Phase difference between signals re-  
 330 veals that species richness is in-phase with precipitation and  
 331 temperature, and anti-phase with elevation and annual tem-  
 332 perature range, at these scales. However, these relationships  
 333 are dependent on scale and taxon. At smaller scales, richness  
 334 of bats, songbirds, hummingbirds and amphibians tends to be  
 335 greatest in the tropics, where calculated coherence highlights  
 336 the importance of topography and temperature range for de-  
 337 termining species richness. Carnivorans, in contrast, show  
 338 little coherence with environmental variables at these scales in  
 339 the tropics. They are instead most coherent in the vicinity of  
 340 the Colorado Plateau and Altiplano. These observations sug-  
 341 gest that large scale ( $> 10^3$  km) variations in environmental  
 342 variables determine almost all of the distribution of terrestrial  
 343 vertebrates. Smaller scale ( $\lesssim 10^3$  km) variation can play an  
 344 important role locally, particularly within the tropics. These  
 345 results highlight the importance of environment change at the  
 346 scale of tens degrees of latitude, and local changes in tropical  
 347 environment, for determining biodiversity.

## 348 Materials and Methods

349  
 350 **Species Richness Data.** Species richness is here defined as number of  
 351 species of a given taxon within a  $10 \times 10$  km square. We use the grids  
 352 compiled by Jenkins et al. (12), which were generated by combining  
 353 maps of species distributions, and counting the number of overlap-  
 354 ping polygons in a given cell. We analyze transects through species

richness maps for the following terrestrial vertebrate taxa: class Mammalia (mammals), order Carnivora (carnivorans) from within Mammalia, order Chiroptera (bats) from within Mammalia, order Passeriformes (songbirds) from within class Aves (birds), family Trochilidae (hummingbirds) from within Aves, and class Amphibia (amphibians). Examples of trends in species richness across the Americas, from latitudes of  $\sim 69^\circ$  N ( $x = 0$ ) to  $\sim 52^\circ$  S, are presented in Figures 1a–e and 2a, c, e, g, i, k. For birds, the species richness data were calculated from breeding ranges compiled by BirdLife International (40). For amphibians and mammals, the data were based on range maps generated by the International Union for Conservation of Nature (41). A minimum grid spacing of 10 km yields a minimum scale for wavelet spectral analysis of  $\sim 20$  km (see below, 14). Species richness varies as a function of the spatial range characteristics of a study, particularly “grain”, i.e. piece-wise horizontal resolution within a study (16, 42, 43). By using a constant grain (i.e. “focus” or grid spacing) of 10 km, challenges associated with comparing results generated using different grains are avoided (16). Here, scale-dependent trends are calculated as a function of “extent” rather than “grain” (*sensu* Palmer & White, 42). Latitudinal terrestrial averages of species richness and environmental data, and their wavelet transforms are shown in Supporting Information Figures S25–S29.

**Elevation Data.** The global elevation grid ETOPO1 has a horizontal resolution of 1 arc-minute (Figure 1g; 18). It is primarily generated from  $\sim 30$  m resolution Shuttle Radar Topography Mission (SRTM30) data and includes interpolated coastlines and satellite altimetry (44). Amante & Eakins (18) suggest a mean vertical error of  $\sim 10$  metres for ETOPO1. Since the horizontal resolution of this dataset is approximately 1.8 km, wavelet transformation of topography in this case would have a minimum scale of  $\sim 3.6$  km (see below, 14). We down-sampled the data to a horizontal resolution of 10 km using Generic Mapping Tools to match resolution of species richness grids (45).

**Climatic Variable Data.** Annual mean values, from 1981–2010, were extracted from the Climatologies at High Resolution for the Earth’s Land Surface Areas (CHELSA) dataset (19). CHELSA was generated by applying corrections to the ERA-Interim climatic reanalysis and has a horizontal resolution of up to 30 arc-seconds (46). Temperature data were corrected for elevation above sea level and precipitation rates were corrected using wind direction, valley exposition and boundary layers. Precipitation rate is weakly dependent on elevation. These values were successfully benchmarked against alternative climatology data and models: WorldClim, TRMM, GPCC and GHCN (47–50). The data were down-sampled to 10 km prior to spectral analyses.

**Continuous Wavelet Transform.** Spatial series,  $x_n$ , of species richness or environmental variables were transformed into distance-wavenumber space using continuous wavelet transforms (see Torrence & Compo, 1998, for practical guide (14)). The transform convolves uniformly sampled spatial series with a mother wavelet,  $\psi$ . The Morlet wavelet with dimensionless frequency  $\omega_0 = 6$  is used in this study, although other mother wavelets are investigated in Supporting Information Figure S6. Use of different mother wavelets (Morlet, order  $\omega_0 = 4, 8$ ; Paul, order  $m = 2, 4, 6$ ; derivative of Gaussian, order  $m = 2, 4, 6$ ) does not significantly change patterns of mapped power, and distance-averaged power shows similar trends to the results presented here. The mother wavelet is scaled and translated along spatial series to reveal variations in amplitude as a function of scale,  $s$ , and position,  $x_n$ . Sampling interval  $\delta j = 10$  km,  $n = 0, 1 \dots N - 1$ , where  $N$  is number of measurements. The wavelet transformation is

$$W_n(s) = \sum_{n'=0}^{N-1} x_n \psi^* \left[ \frac{(n' - n)\delta t}{s} \right], \quad [1]$$

where  $*$  denotes the complex conjugate. We use the `mlpy` Python module to transform the spatial series (51), which is based on the methods summarized by Torrence & Compo, 1998 (14). Spatial series were mirrored across the  $x$  (distance) and  $y$  (dependent variable) axes to reduce edge effects (21). Inverse transforms were generated for each signal to quantify fidelity of transformed series.

Median difference between input signals and inverse transforms were always  $\leq 0.9\%$ . The distance-averaged power spectrum, which yields similar results to Fourier transformation, is given by

$$\phi(s) = \frac{1}{N} \sum_{x=0}^N |W_n(s)|^2. \quad [2]$$

We plot rectified distance-averaged power  $\phi_r = \phi(s)s^{-1}$  after Liu et al., 2007 (52). Note that power was normalized by the proportion of the transect within/outside of the tropics respectively, so there is no bias in distance-averaged power if the transect has a greater distance within/outside of tropical latitudes. Best-fitting spectral slopes were identified using simple one- and two-slope models after Roberts et al. (21, see Supporting Information).

**Cross Wavelet Power & Wavelet Coherence.** Cross wavelet power is calculated to identify signals in separate spatial series (e.g. carnivores and elevation) that have large amplitudes located at the same position in distance-wavenumber space. To facilitate comparison, signals are normalized to zero mean and unit variance prior to transformation. The normalized signals  $X$  and  $Y$ , are transformed to yield  $W^X$  and  $W^Y$ . Cross wavelet power is calculated such that

$$W^{XY} = W^X W^{Y*}. \quad [3]$$

Wavelet coherence,  $R_n^2$ , is calculated to identify parts of signals that are coherent, but not necessarily of high amplitude, such that

$$R_n^2(s) = \frac{|S\{s^{-1}W_n^{XY}(s)\}|^2}{S\{s^{-1}|W_n^X(s)|^2\} \cdot S\{s^{-1}|W_n^Y(s)|^2\}}, \quad [4]$$

where  $s, n$  and  $W_n(s)$  are as in Equation 1.  $S$  is an operator that smooths along distance and scale (15).

Since each of the studied signals broadly exhibits a red noise relationship between power and wavenumber, there is a chance that sections of transects could correlate by chance, without true inter-dependence. Therefore, it is important to calculate the coherence between each pair of signals, and not simply the cross wavelet power. The 90% significance limit for coherence depends only on scale and was calculated using Monte Carlo methods with the `PyCWT` Python module (15, 53). The minimum bound for coherence per scale, for each transect, was calculated from cross wavelet power spectral analysis of 300 random signals, which follow a red noise spectral relationship, generated by the same autocorrelation coefficient as the input signals.

The local phase difference (angular offset,  $0 \leq a \leq 2\pi$ ) of two signals is given by the complex argument of their cross wavelet transform,  $\arg(W^{XY})$  (15). Figure 3 indicates phase difference as arrows measured from horizontal: in-phase,  $a = 0, \triangleright$ ; anti-phase,  $a = \pi, \triangleleft$ . A working example for species richness and elevation, including continuous wavelet transformation, cross wavelet power and wavelet coherence calculations, can be found at <https://doi.org/10.5281/zenodo.XXXXXX>.

**ACKNOWLEDGMENTS.** C.O. was supported by the Leverhulme Trust (Grant: RPG-2019-073). P.D.M. was supported by a Royal Society University Research Fellowship (UF160216). Figures were generated using Generic Mapping Tools v6.2.0 (45). We thank P. Ball, C. Donaldson, F. Richards and A. Whittaker for helpful discussion.

1. A Balmford, W Bond, Trends in the state of nature and their implications for human well-being. *Ecol. Lett.* **8**, 1218–1234 (2005).
2. CB Barrett, AJ Travis, P Dasgupta, On biodiversity conservation and poverty traps. *PNAS* **108**, 13907–13912 (2011).
3. D Corenblit, et al., Feedbacks between geomorphology and biota controlling Earth surface processes and landforms: A review of foundation concepts and current understandings. *Earth-Science Rev.* **106**, 307–331 (2011).
4. S Fei, J Phillips, M Shouse, Biogeomorphic impacts of invasive species. *Annu. Rev. Ecol. Evol. Syst.* **45**, 69–87 (2014).
5. A Hampe, RJ Petit, Conserving biodiversity under climate change: The rear edge matters. *Ecol. Lett.* **8**, 461–467 (2005).
6. MB Araújo, C Rahbek, How Does Climate Change Affect Biodiversity? *Science* **313**, 1396–1397 (2006).
7. RD Norris, S Kirtland Turner, PM Hull, A Ridgwell, Marine ecosystem responses to Cenozoic global change. *Science* **341**, 492–498 (2013).

- 489 8. D Nogués-Bravo, et al., Cracking the Code of Biodiversity Responses to Past Climate Change. *Trends Ecol. Evol.* **33**, 765–776 (2018).
- 490
- 491 9. C Rahbek, GR Graves, Multiscale assessment of patterns of avian species richness. *PNAS* **98**, 4534–4539 (2001).
- 492
- 493 10. A Antonelli, et al., Geological and climatic influences on mountain biodiversity. *Nat. Geosci.* **11**, 718–725 (2018).
- 494
- 495 11. CN Jenkins, L Joppa, Expansion of the global terrestrial protected area system. *Biol. Conserv.* **142**, 2166–2174 (2009).
- 496
- 497 12. CN Jenkins, SL Pimm, LN Joppa, Global patterns of terrestrial vertebrate diversity and conservation. *PNAS* **110**, E2603–E2610 (2013).
- 498
- 499 13. J Jenkins, SN Stephenson, P Martínez-Garzón, M Bohnhoff, M Nurlu, Crustal Thickness Variation Across the Sea of Marmara Region, NW Turkey: A Reflection of Modern and Ancient Tectonic Processes. *Tectonics* **39**, 1–18 (2020).
- 500
- 501
- 502 14. C Torrence, GP Compo, A practical guide to wavelet analysis. *Bull. Am. Meteorol. Soc.* **79**, 61–78 (1998).
- 503
- 504 15. A Grinsted, JC Moore, S Jevrejeva, Application of the cross wavelet transform and wavelet coherence to geophysical time series. *Nonlinear Process. Geophys.* **11**, 561–566 (2004).
- 505
- 506 16. MR Willig, DM Kaufman, RD Stevens, Latitudinal Gradients of Biodiversity: Pattern, Process, Scale, and Synthesis. *Annu. Rev. Ecol. Evol. Syst.* **34**, 273–309 (2003).
- 507
- 508 17. H Hillebrand, On the generality of the latitudinal diversity gradient. *Am. Nat.* **163**, 192–211 (2004).
- 509
- 510 18. C Amante, BW Eakins, ETOPO1 Arc-minute global relief model: Procedures, data sources and analysis. (NOAA, Boulder, Colorado), Technical report (2009).
- 511
- 512 19. DN Karger, et al., Climatologies at high resolution for the earth's land surface areas. *Sci. Data* **4**, 1–20 (2017).
- 513
- 514 20. DH Janzen, Why Mountain Passes are Higher in the Tropics. *The Am. Nat.* **101**, 233–249 (1967).
- 515
- 516 21. GG Roberts, N White, BH Lodhia, The Generation and Scaling of Longitudinal River Profiles. *J. Geophys. Res. Earth Surf.* **124**, 17 (2019).
- 517
- 518 22. I Wapenans, VM Fernandes, C O'Malley, N White, GG Roberts, Scale-Dependent Contributors to River Profile Geometry. *J. Geophys. Res. Earth Surf.* **126**, 1–25 (2021).
- 519
- 520 23. JT Eronen, CM Janis, CP Chamberlain, A Mulch, Mountain uplift explains differences in Palaeogene patterns of mammalian evolution and extinction between North America and Europe. *Proc. Royal Soc. B: Biol. Sci.* **282**, 1–8 (2015).
- 521
- 522
- 523 24. J Rolland, FL Condamine, CR Beeravolu, F Jiguet, H Morlon, Dispersal is a major driver of the latitudinal diversity gradient of Carnivora. *Glob. Ecol. Biogeogr.* **24**, 1059–1071 (2015).
- 524
- 525 25. C Rahbek, et al., Humboldt's enigma: What causes global patterns of mountain biodiversity? *Science* **365**, 1108–1113 (2019).
- 526
- 527 26. AP Allen, JF Gillooly, VM Savage, JH Brown, Kinetic effects of temperature on rates of genetic divergence and speciation. *PNAS* **103**, 9130–9135 (2006).
- 528
- 529 27. O Hagen, A Skeels, RE Onstein, W Jetz, L Pellissier, Earth history events shaped the evolution of biodiversity across tropical rainforests. *PNAS* **118**, 1–11 (2021).
- 530
- 531 28. LB Buckley, W Jetz, Environmental and historical constraints on global patterns of amphibian richness. *Proc. Royal Soc. B* **274**, 1167–1173 (2007).
- 532
- 533 29. R Field, et al., Spatial species-richness gradients across scales: A meta-analysis. *J. Biogeogr.* **36**, 132–147 (2009).
- 534
- 535 30. SB Archibald, WH Bossert, DR Greenwood, BD Farrell, Seasonality, the latitudinal gradient of diversity, and Eocene insects. *Paleobiology* **36**, 374–398 (2010).
- 536
- 537 31. SB Archibald, DR Greenwood, RW Mathewes, Seasonality, montane beta diversity, and Eocene insects: Testing Janzen's dispersal hypothesis in an equable world. *Palaeogeogr. Palaeoclimatol. Palaeoecol.* **371**, 1–8 (2013).
- 538
- 539
- 540 32. PD Mannion, P Upchurch, RBJ Benson, A Goswami, The latitudinal biodiversity gradient through deep time. *Trends Ecol. Evol.* **29**, 42–50 (2014).
- 541
- 542 33. H Song, et al., Flat latitudinal diversity gradient caused by the Permian-Triassic mass extinction. *Proc. Natl. Acad. Sci. United States Am.* **117**, 17578–17583 (2020).
- 543
- 544 34. EE Saupe, Explanations for tropical diversity gradients are rooted in the deep past. *PNAS* **118**, 1–3 (2021).
- 545
- 546 35. BA Hawkins, EE Porter, JAF Diniz-Filho, Productivity and history as predictors of the latitudinal diversity gradient of terrestrial birds. *Ecology* **84**, 1608–1623 (2003).
- 547
- 548 36. M Kessler, L Salazar, J Homeier, J Kluge, Species richness-productivity relationships of tropical terrestrial ferns at regional and local scales. *J. Ecol.* **102**, 1623–1633 (2014).
- 549
- 550 37. LN Gillman, et al., Latitude, productivity and species richness. *Glob. Ecol. Biogeogr.* **24**, 107–117 (2015).
- 551
- 552 38. SA Fritz, et al., Twenty-million-year relationship between mammalian diversity and primary productivity. *PNAS* **113**, 10908–10913 (2016).
- 553
- 554 39. NR Polato, et al., Narrow thermal tolerance and low dispersal drive higher speciation in tropical mountains. *PNAS* **115**, 12471–12476 (2018).
- 555
- 556 40. BirdLife International NatureServe, Bird Species Distribution Maps of the World (2011) BirdLife International, Cambridge, UK.
- 557
- 558 41. International Union for Conservation of Nature, The IUCN Red List of Threatened Species (2021).
- 559
- 560 42. MW Palmer, PS White, Scale Dependence and the Species-Area Relationship. *The Am. Nat.* **144**, 717–740 (1994).
- 561
- 562 43. KJ Gaston, Global patterns in biodiversity. *Nature* **405**, 220–227 (2000).
- 563
- 564 44. A Jarvis, HI Reuter, A Nelson, E Guevara, Hole-filled seamless SRTM data V4 (2008).
- 565
- 566 45. P Wessel, et al., The Generic Mapping Tools Version 6. *Geochem. Geophys. Geosystems* **20**, 1–9 (2019).
- 567
- 568 46. DP Dee, et al., The ERA-Interim reanalysis: Configuration and performance of the data assimilation system. *Q. J. Royal Meteorol. Soc.* **137**, 553–597 (2011).
- 569
- 570 47. RJ Hijmans, SE Cameron, JL Parra, PG Jones, A Jarvis, Very high resolution interpolated climate surfaces for global land areas. *Int. J. Climatol.* **25**, 1965–1978 (2005).
- 571
- 572 48. Goddard Earth Sciences Data and Information Services Center, TRMM (TMPA/3B43) Rainfall Estimate L3 1 Month 0.25 Degree x 0.25 Degree V7 (2017).
- 573 49. U Schneider, et al., GPCC's new land surface precipitation climatology based on quality-controlled in situ data and its role in quantifying the global water cycle. *Theor. Appl. Climatol.* **115**, 15–40 (2014).
- 574
- 575 50. JH Lawrimore, et al., An overview of the Global Historical Climatology Network monthly mean temperature data set, version 3. *J. Geophys. Res. Atmospheres* **116**, 1–18 (2011).
- 576
- 577 51. D Albanese, et al., mlpy: Machine Learning Python (2012).
- 578 52. Y Liu, XS Liang, RH Weisberg, Rectification of the bias in the wavelet power spectrum. *J. Atmospheric Ocean. Technol.* **24**, 2093–2102 (2007).
- 579
- 580 53. S Krieger, N Freij, A Brazhe, C Torrence, GP Compo, PyCWT: A Python module for continuous wavelet spectral analysis, (2020).
- 581
