# 1 Coherence of Terrestrial Vertebrate Species Richness with 2 External Drivers Across Scales and Taxonomic Groups

3 Conor P. B. O'Malley<sup>1a</sup>, Gareth G. Roberts<sup>1b</sup>, Philip D. Mannion<sup>2c</sup>, Jan Hackel<sup>3d</sup>, Yanghua Wang<sup>1e</sup>

4 5th September 2022

5 <sup>1</sup>Department of Earth Science & Engineering, Imperial College London, Royal School of Mines,  
6 Prince Consort Road, London SW7 2BP, UK

7 <sup>2</sup>Department of Earth Sciences, University College London, London WC1E 6BT, UK

8 <sup>3</sup>Department of Trait Diversity and Function, Royal Botanic Gardens, Kew, London TW9 3AE, UK

9 <sup>a</sup>*conor.omalley19@imperial.ac.uk*

10 <sup>b</sup>*gareth.roberts@imperial.ac.uk*

11 <sup>c</sup>*philipdmannion@gmail.com*

12 <sup>d</sup>*J.Hackel@kew.org*

13 <sup>e</sup>*yanghua.wang@imperial.ac.uk*

14  
15 **Corresponding Author:** Conor P. B. O'Malley, Royal School of Mines, Prince Consort Road, London  
16 SW7 2BP, UK. [conor.omalley19@imperial.ac.uk](mailto:conor.omalley19@imperial.ac.uk)

17 **Data Availability Statement:** If the manuscript is accepted, the data supporting the results will  
18 be archived on Zenodo: <https://doi.org/10.5281/zenodo.XXXXXX>.

19 **Funding Statement:** C.O. was supported by the Leverhulme Trust (Grant: RPG-2019-073, which  
20 was awarded to G.R.). P.D.M. was supported by a Royal Society University Research Fellowship  
21 (UF160216).

22 **Conflict of Interest Disclosure:** The authors declare no conflict of interest.

23 **Authorship Statement:** C.O. and G.R. designed the project, developed code, interpreted results  
24 and wrote the manuscript with contributions from P.M., Y.W., J.H.; C.O performed the analyses and  
25 generated figures.

26 **Acknowledgements:** We thank P. Ball, C. Donaldson, F. Richards and A. Whittaker for helpful  
27 discussion. Figures were generated using Generic Mapping Tools v6.2.0 (Wessel *et al.*, 2019).

28 **Short Running Title:** Coherence of Biodiversity & Environment

29 **Keywords:** biodiversity, climate, topography, scale dependence, species richness, spectral analysis

## Abstract

**Aim:** Understanding connections between environment and biodiversity is crucial for conservation, identifying causes of ecosystem stress, and predicting population responses to changing environments. Explaining biodiversity requires an understanding of how species richness and environment co-vary across scales. Here, we identify scales and locations at which biodiversity is generated and correlates with environment.

**Location:** Full latitudinal range per continent.

**Time period:** Present-day.

**Major taxa studied:** Terrestrial vertebrates: all mammals, carnivorans, bats, songbirds, hummingbirds, amphibians.

**Methods:** We describe the use of wavelet power spectra, cross-power and coherence for identifying scale-dependent trends across Earth's surface. Spectra reveal scale- and location-dependent coherence between species richness and topography ( $E$ ), mean annual precipitation ( $Pn$ ), temperature ( $Tm$ ) and annual temperature range ( $\Delta T$ ).

**Results:** > 97% of species richness of taxa studied is generated at large scales, i.e. wavelengths  $\gtrsim 10^3$  km, with 30–69% generated at scales  $\gtrsim 10^4$  km. At these scales, richness tends to be highly coherent and anti-correlated with  $E$  and  $\Delta T$ , and positively correlated with  $Pn$  and  $Tm$ . Coherence between carnivoran richness and  $\Delta T$  is low across scales, implying insensitivity to seasonal temperature variations. Conversely, amphibian richness is strongly anti-correlated with  $\Delta T$  at large scales. At scales  $\lesssim 10^3$  km, examined taxa, except carnivorans, show highest richness within the tropics. Terrestrial plateaux exhibit high coherence between carnivorans and  $E$  at scales  $\sim 10^3$  km, consistent with contribution of large-scale tectonic processes to biodiversity. Results are similar across different continents and for global latitudinal averages. Spectral admittance permits derivation of rules-of-thumb relating long-wavelength environmental and species richness trends.

**Main conclusions:** Sensitivities of mammal, bird and amphibian populations to environment are highly scale-dependent. At large scales, carnivoran richness is largely independent of temperature and precipitation, whereas amphibian richness correlates strongly with precipitation and temperature, and anti-correlated with temperature range. These results pave the way for spectral-based calibration of models that predict biodiversity response to climate change scenarios.

## 1 Introduction

Biological diversity is critical to many basic human needs, including health, food, water and shelter. It also plays an important role in moderating physical and chemical processes in natural environments

63 (Balmford & Bond, 2005; Barrett *et al.*, 2011; Corenblit *et al.*, 2011; Fei *et al.*, 2014; Mori *et al.*, 2022).  
64 Quantifying links between environment and biodiversity is crucial for understanding the response of  
65 ecosystems to climatic and physiographic change, and for conservation efforts (Araújo & Rahbek, 2006;  
66 Hampe & Petit, 2005; Norris *et al.*, 2013; Yasuhara *et al.*, 2020a). Many extrinsic processes postulated  
67 to control biodiversity (e.g. climate) are rapidly changing; therefore quantifying the strength of rela-  
68 tionships between them is a pressing concern (Nogués-Bravo *et al.*, 2018).

69

70 Environmental variables and species richness exhibit variance in space across a range of scales (e.g.  
71 Belmaker & Jetz, 2011; Buckley *et al.*, 2012; Keil & Chase, 2019). However, it is unclear whether  
72 coherence between variables is uniform across all scales Storch *et al.* (2007). In this study we test  
73 the following five hypotheses. First, species richness is highly coherent with environmental variables  
74 across all scales. That would imply a direct forcing of richness by external drivers regardless of scale.  
75 It would give a basis for using theory developed to predict species richness at one scale (e.g. field sites)  
76 to predict richness at all scales. Secondly, species richness is most coherent with external variability at  
77 small scales, i.e. local changes in environment determine where species richness prospers. Thirdly, spe-  
78 cies richness is most coherent with changes in environment at large scales, i.e. global scale variability  
79 (e.g. large-scale climate change). Fourthly, the coherence of species richness with external variables  
80 depends on taxon. In other words, taxa have unique responses to environment variables. Finally,  
81 species richness does not directly depend on environment (i.e. coherence between species richness and  
82 environmental variables is low). Instead, species richness depends upon other factors, namely biotic  
83 interactions (prey-predator, competition), and/or historical contingencies.

84

85 Here, we test the five hypotheses by quantifying coherence between species richness of continental  
86 vertebrate taxa and elevation, precipitation, temperature, and annual temperature range, which are  
87 postulated to drive biodiversity (e.g. Antonelli *et al.*, 2018; Rahbek & Graves, 2001). As a starting  
88 point, we focus on mapping coherence between contemporary biotic and environmental signals as a  
89 function of scale and location, using wavelet spectral analyses. Many existing approaches, e.g. spa-  
90 tial regression analyses, are unsuited to testing such hypotheses because of the challenges associated  
91 with disentangling scale and location from biotic and environmental data to identify correlations. In-  
92 stead, here, we use wavelet spectral analyses, which inherently disentangle scale-dependent effects, and  
93 identify strength of correlation between variables at individual scales. Such analyses have been used to  
94 identify scale-dependence of temporal biotic series, to filter spatial series and identify outliers, and to  
95 investigate biodiversity on local ( $\lesssim 500$  km) scales (Carl *et al.*, 2008, 2016; Dormann *et al.*, 2007; Keitt,  
96 2007; Ma & Zhang, 2015; Roberts & Mannion, 2019). We acknowledge that other processes, including  
97 species-species interactions, are also important for determining species richness (e.g. Chaudhary *et al.*,  
98 2021; Yasuhara *et al.*, 2020b; Yasuhara & Deutsch, 2022). As such, we also present a preliminary

99 assessment of the coherence between species richness of different taxa, in Supporting Information. We  
100 return to discuss the results of these tests in the context of the five hypotheses described above, in the  
101 concluding section of this manuscript.

102

103 Identifying links between biodiversity and environment has recently become significantly more  
104 tractable for three reasons. First, global patterns of species richness have been estimated with un-  
105 precedented detail, from horizontal scales as broad as continents, to those as fine as  $\sim 10$  km in  
106 wavelength (e.g. Jenkins & Joppa, 2009; Jenkins *et al.*, 2013, 2020; Kass *et al.*, 2022; Marsh *et al.*,  
107 2022). Second, values and variance of many environmental variables postulated to be responsible for  
108 determining distributions of species are now available globally at even higher resolution (e.g. Kar-  
109 ger *et al.*, 2017). Finally, wavelet spectral methods, which can identify the locations and scales at  
110 which signals (e.g. spatial series of taxa) are generated, as well as coherence and phase differences  
111 (offsets) between series such as species richness, topography and climate, are now established (see  
112 Materials and Methods; Grinstead *et al.*, 2004; Torrence & Compo, 1998). Such analyses are key to  
113 understanding how the changing global climate will affect the distribution of biodiversity across Earth.

114

## 115 2 Materials and Methods

### 116 2.1 Species Richness Data

117 Species richness is here defined as number of species of a given taxon within a  $10 \times 10$  km square. We  
118 use the grids compiled by Jenkins *et al.* (2013), which were generated by combining maps of species  
119 distributions, and counting the number of overlapping polygons in a given cell. For birds, the species  
120 richness data were calculated from breeding ranges compiled by BirdLife International NatureServe  
121 (2011). For amphibians and mammals, the data were based on expert range maps generated by the  
122 International Union for Conservation of Nature (2021).

123

124 Figure 1a–f shows species richness per  $10 \times 10$  km cell for all mammals (Mammalia), carnivorans  
125 (Carnivora), bats (Chiroptera), songbirds (Passeriformes), hummingbirds (Trochilidae), and amphi-  
126 bians (Amphibia). In Supporting Information Figures 1–2, we show species richness and associated  
127 analyses for other evaluated taxonomic groups (including Cetartiodactyla, Eulipotyphla, primates,  
128 marsupials, rodents, parrots, and frogs). The taxa which we focus on in the main text of this study  
129 have the greatest latitudinal coverage and are well-mapped, and they also cover a range of modes of life.  
130 The data shown in Figure 1 reinforce well-known large-scale observations, e.g. the latitudinal diversity  
131 gradient, but also contain evidence of significant complexity across scales of interest, here wavelengths

132 between 10–10<sup>4</sup> km (e.g. Hillebrand, 2004; Willig *et al.*, 2003). We examine species richness trends in  
133 this study, since it is a straightforward measure of diversity, and has been determined for a wide range  
134 of taxa from fine scales up to near global scales. Here, we focus on terrestrial vertebrate taxa since  
135 terrestrial surface environmental conditions are well-mapped, as is terrestrial vertebrate biodiversity.  
136 Similar analysis is possible for marine taxa, invertebrates, plants etc., and for metrics other than spe-  
137 cies richness, for example range sizes and trophic interactions.

138

139 Species richness varies as a function of the spatial range characteristics of a study, particularly  
140 “grain”, i.e. piece-wise horizontal resolution within a study (Gaston, 2000; Palmer & White, 1994;  
141 Willig *et al.*, 2003). By using a constant grain (i.e. “focus” or grid spacing) of 10 km, challenges  
142 associated with comparing results generated using different grains are avoided (Willig *et al.*, 2003).  
143 Here, scale-dependent trends are calculated as a function of “extent”, i.e. total width of study region,  
144 rather than “grain”, i.e. width of each plot/grid cell within the study region *sensu* Palmer & White  
145 (1994). Hurlbert & Jetz (2007) indicated that range map data might only be valid at wavelengths  
146 > 100 km. In this study, we evaluate how short-wavelength uncertainties in species richness contribute  
147 to uncertainties in calculated wavelet spectra by adding theoretical noise to transects before they are  
148 transformed into the spectral domain (Supporting Information Figure 3; panels a–c show results of  
149 adding white noise which has wavelengths between 10–100 km). Latitudinal transects through ter-  
150 restrial vertebrate richness and environmental data are shown in Figure 2. We show data from the  
151 Americas, where transects can be generated that encompass almost all of Earth’s latitudinal range  
152 (Figures 1 & 2: A–A’). Transects through data for Australia (B–B’), Africa (C–C’), Eurasia (D–  
153 D’) and global averages are shown in Supporting Information Figures 4–7.

154

## 155 2.2 Environmental Variable Data

156 Figures 1g–j and 2m, o, q and s show examples of maps and cross sections through elevation and  
157 climatic data which we use, from the ETOPO1 and CHELSA datasets, respectively (Amante & Eakins,  
158 2009; Karger *et al.*, 2017).

159

160 The global elevation grid ETOPO1 has a horizontal resolution of 1 arc-minute (Figure 1g; Amante  
161 & Eakins, 2009). It is primarily generated from ~ 30 m resolution Shuttle Radar Topography Mis-  
162 sion (SRTM30) data and includes interpolated coastlines and satellite altimetry (Jarvis *et al.*, 2008).  
163 Amante & Eakins (2009) suggested a mean vertical error of ~ 10 metres for ETOPO1. We down-  
164 sampled the data to a horizontal resolution of 10 km using Generic Mapping Tools to match resolution  
165 of species richness grids (Wessel *et al.*, 2019).

166

167 Annual mean values for climatic data, from 1981–2010, were extracted from the Climatologies at  
168 High Resolution for the Earth’s Land Surface Areas (CHELSA) dataset (Karger *et al.*, 2017). CHELSA  
169 was generated by applying corrections to the ERA-Interim climatic reanalysis and has a horizontal  
170 resolution of up to 30 arc-seconds (Dee *et al.*, 2011). Temperature data were corrected for elevation  
171 above sea level and precipitation rates were corrected using wind direction, valley exposition and  
172 boundary layers. Precipitation rate is weakly dependent on elevation. These values were successfully  
173 benchmarked against alternative climatology data and models: WorldClim, TRMM, GPCP and GHCN  
174 (Hijmans *et al.*, 2005; Goddard Earth Sciences Data and Information Services Center, 2017; Lawrimore  
175 *et al.*, 2011; Schneider *et al.*, 2014). The data were down-sampled to 10 km prior to spectral analyses.

## 176 2.3 Continuous Wavelet Transform

177 Spatial series,  $x_n$ , of species richness or environmental variables were transformed into distance-  
178 wavenumber space using continuous wavelet transforms (for practical guide, see Torrence & Compo,  
179 1998). The transform convolves uniformly sampled spatial series with a mother wavelet,  $\psi$ . The  
180 Morlet wavelet with dimensionless frequency  $\omega_o = 6$  is used in this study, although other mother  
181 wavelets are investigated in Supporting Information Figure 8. Use of different mother wavelets (Mor-  
182 let, order  $\omega_o = 4, 8$ ; Paul, order  $m = 2, 4, 6$ ; derivative of Gaussian, order  $m = 2, 4, 6$ ) does not  
183 significantly change patterns of mapped power, and distance-averaged power shows similar trends to  
184 the results presented here. The mother wavelet is scaled and translated along spatial series by  $n'$  to  
185 reveal variations in amplitude as a function of scale,  $s$ , and position,  $x_n$ . Sampling interval  $\delta t = 10$   
186 km,  $n = 0, 1 \dots N - 1$ , where  $N$  is number of measurements. The wavelet transformation is

$$W_n(s) = \sum_{n'=0}^{N-1} x_n \psi^* \left[ \frac{(n' - n)\delta t}{s} \right], \quad (1)$$

187 where  $*$  denotes the complex conjugate. We use the `mlpy` Python module to transform the spatial  
188 series (Albanese *et al.*, 2012), which is based on the methods summarized by Torrence & Compo  
189 (1998). Scales were calculated using the approach described in Torrence & Compo (1998), such that  
190  $s_j = s_o 2^{j\delta_j}$ , where  $j = 0, 1, \dots J$ . The smallest scale,  $s_o = 2\delta t$ . A minimum grid spacing of 10 km  
191 therefore yields a minimum scale for wavelet spectral analysis of  $\sim 20$  km (Torrence & Compo, 1998).  
192 In the example shown in Figure 2,  $N = 1598$ ,  $\delta_j = 0.1$  and  $J = 96$ , which yields a total of 97 scales  
193 that range from  $\sim 20$  to  $\sim 15,521$  km. Spatial series were mirrored across the  $x$  (distance) and  
194  $y$  (dependent variable) axes to reduce edge effects (Roberts *et al.*, 2019). Inverse transforms were  
195 reconstructed for each signal to quantify fidelity of transformed series (see Torrence & Compo, 1998).  
196 Median difference between input signals and inverse transforms were always  $\leq 0.9\%$ . Signals can be  
197 filtered by calculating inverse transforms at specific wavelengths. For example, Figure 2a, c, e, g, i and

198 k show inverse transforms of species richness spectra at scales  $> 10^3$  km. Depending on taxonomic  
199 group, these filtered signals fit the input species richness trends with mean differences of 4.4–25% (see  
200 Figure 2 caption for mean raw differences in terms of species per pixel, spx). The same filtering process,  
201 but including wavelengths  $> 10^2$  km, yields mean differences of only 0.7–4.7%. The distance-averaged  
202 power spectrum, which yields similar results to Fourier transformation, is given by

$$\phi(s) = \frac{1}{N} \sum_{x=0}^N |W_n(s)|^2. \quad (2)$$

203 In Figure 2, we plot rectified distance-averaged power  $\phi_r = \phi(s)s^{-1}$  after Liu *et al.* (2007). We  
204 calculate distance-averaged power within and outside of the tropics, but note that in those calcula-  
205 tions, power was normalized by the proportion of the transect within/outside of the tropics respect-  
206 ively. Therefore there is no bias in distance-averaged power if the transect has a greater distance  
207 within/outside of tropical latitudes. A guide to scale-dependence and self-similarity of spatial series is  
208 the color of spectral noise that they possess. For example, red (Brownian) noise occurs when  $\phi \propto k^{-2}$ ,  
209 where  $k$  is wavenumber or spatial frequency, proportional to  $1/\text{wavelength}$ , indicating self-similarity.  
210 Pink noise occurs when  $\phi \propto k^{-1}$ , and white noise indicates that power is equal across all scales,  
211  $\phi \propto 1$ . Best-fitting spectral slopes for all variables and transects were identified using simple one- and  
212 two-slope models after Roberts *et al.* (2019); see Supporting Information Figures 9–18.

## 213 2.4 Cross Wavelet Power & Wavelet Coherence

214 Cross wavelet power is calculated to identify signals in separate spatial series (e.g. amphibian richness  
215 and precipitation) that have large amplitudes located at the same position in distance-wavenumber  
216 space. To facilitate comparison, signals are normalized to zero mean and unit variance prior to trans-  
217 formation. The normalized signals  $X$  and  $Y$ , are transformed to yield  $W^X$  and  $W^Y$ . Cross wavelet  
218 power  $W^{XY}$  is calculated such that

$$W^{XY} = W^X W^{Y*}, \quad (3)$$

219 where  $*$  denotes complex conjugation. Wavelet coherence,  $R_n^2$ , is calculated to identify parts of signals  
220 that are coherent, but not necessarily of common high amplitude, such that

$$R_n^2(s) = \frac{|S\{s^{-1}W_n^{XY}(s)\}|^2}{S\{s^{-1}|W_n^X(s)|^2\} \cdot S\{s^{-1}|W_n^Y(s)|^2\}}, \quad (4)$$

221 where  $s, n$  and  $W_n(s)$  are as in Equation 1.  $S$  is an operator that smooths along distance and scale  
222 (Grinsted *et al.*, 2004).

223

224 Signals with certain spectral distributions (e.g. red noise) can, by chance, correlate without true

225 interdependence. Therefore, it is important to calculate the coherence between each pair of signals,  
226 and not simply their cross wavelet power. Torrence & Compo (1998), Grinsted *et al.* (2004) and others  
227 have shown that coherence between signals above (assumed) background noise (i.e. spectral distribu-  
228 tions) can be estimated by first calculating the coherence between large numbers of surrogate datasets  
229 with the same autoregressive (AR) coefficients as the original data set. In this study, the minimum  
230 bound for statistically significant coherence (above assumed background noise) per scale, for each tran-  
231 sect, was calculated from cross wavelet power spectral analysis of 300 random signals. Guided by the  
232 spectral content of actual biotic and environmental signals, we assumed that each theoretical random  
233 signal has a red noise distribution, which was generated using the same autocorrelation coefficient as  
234 the actual input signals. The surrogates also have the same length and number of measurements,  
235  $N$ , as the actual signals. The 90% significance limit for coherence, which was used to mask Figure  
236 3, depends only on scale and not position, and was calculated using Monte Carlo methods with the  
237 PyCWT Python module (Grinsted *et al.*, 2004; Krieger *et al.*, 2020).

238

239 The local phase difference (angular offset,  $0 \leq a \leq 2\pi$ ) of two signals is given by the complex  
240 argument of their cross wavelet transform,  $\arg(W^{XY})$  (Grinsted *et al.*, 2004). Figure 3 indicates  
241 phase difference as arrows measured from horizontal: in-phase,  $a = 0$ ,  $\triangleright$ ; anti-phase,  $a = \pi$ ,  $\triangleleft$ .  
242 A working example for species richness and elevation, including continuous wavelet transformation,  
243 cross wavelet power and wavelet coherence calculations, can be found at [https://doi.org/10.5281/](https://doi.org/10.5281/zenodo.XXXXXX)  
244 [zenodo.XXXXXX](https://doi.org/10.5281/zenodo.XXXXXX).

## 245 3 Results and Discussion

### 246 3.1 Wavelet Transformation of Richness and Environmental Variables

247 Spectral analyses of vertebrate species richness and environmental variables are shown in Figures 2 and  
248 3. Figure 2 shows that highest spectral power,  $\phi (\propto z^2$ , where  $z$  is signal amplitude), is concentrated  
249 at largest scales for all taxa and environmental variables studied. Dependent on taxonomic group,  
250 from 96% to almost 100% of power resides at wavelengths  $> 10^3$  km. 30–69% of power resides at  
251 wavelengths  $\gtrsim 10^4$  km. These results reinforce the notion that species richness is dominated by long  
252 wavelength, latitudinal, variability.

253

254 Species richness tends to have a pink noise spectrum (see Supporting Information Figures 9–18).  
255 Thereby, shorter wavelength features in species richness signals tend to have the lowest amplitudes  
256 and comprise relatively little (few %) of species richness signal at a particular location. Mammals  
257 and bats are better characterized by red noise at long wavelengths. This result implies self-similarity



258 across scales, and that signal amplitudes decrease even more rapidly with decreasing wavelength than  
259 for other taxa. At wavelengths  $\gtrsim 10^3$  km, species richness power for amphibians is best characterized  
260 as blue noise, i.e.  $\phi \propto k^1$ . This trend is not observed along the entire transect, but indicates that short  
261 wavelength features can be increasingly important contributors to amphibian richness (see Figure 2f).  
262 A single spectral slope akin to pink noise can adequately fit the amphibian richness spectrum (see e.g.  
263 Supporting Information Figure 9f).

264

265 We address concerns regarding the accuracy of range maps in two ways. First, we show the results  
266 of inverse wavelet transforms at scales  $> 1000$  km alongside the results for transformation of the full  
267 frequency content of the available data. Secondly, we explore the impact of inserting distributions  
268 of theoretical, hitherto unknown, species in a suite of increasing severe tests for our results and con-  
269 clusions. White noise was added to the amphibian transect in a systematic set of tests. These tests  
270 examined changes in calculated spectra when noise with maximum amplitudes of 10%, 50% and 100%  
271 of the standard deviation of the original signal's amplitude (in this case = 24 species per pixel) was  
272 added to the transect prior to transformation. These tests included adding noise at wavelengths  $\lesssim 100$ ,  
273  $\lesssim 1000$  and  $\lesssim 10,000$  km (Supporting Information Figure 3). As expected, these tests indicated that  
274 spectral power is least likely to be well constrained at short wavelengths. Nonetheless, these tests  
275 indicate that even high amplitude uniformly distributed noise does not significantly change the over-  
276 all spectral characteristics of terrestrial species richness. Finally, we note that that Hurlbert & Jetz  
277 (2007) suggest that species richness values estimated from range maps are likely to be overestimates at  
278 short length scales compared to richness estimated from atlas data (e.g. their Figure 5). That result  
279 indicates that range maps are more likely to generate higher power at short wavelengths than maps  
280 derived from atlas data. Therefore, spectra derived from atlas data are likely to be even redder than  
281 those obtained from range maps. In other words, our conclusion that species richness is dominated  
282 by long wavelength structure is expected to be insensitive to the choice of range or atlas data. In  
283 fact, atlas data is likely to more strongly emphasize the importance of long wavelength variability for  
284 determining species richness. We suggest that these observations and results indicate that range maps  
285 are useful for our purposes.

286

287 Although almost no power is concentrated below wavelengths of  $\sim 100$  km for any of the taxa  
288 examined here, there are regions of some wavelet transforms which show increased power in the range  
289  $\sim 300$ – $1000$  km. This deviation, away from a broadly monotonic decrease in power towards shorter  
290 wavelengths, is driven principally by species richness within tropical latitudes, and is especially prom-  
291 inent for songbirds, hummingbirds and amphibians (Figure 2h, j, l). Supporting Information Figure  
292 19a–f shows that at wavelengths  $\gtrsim 1000$  km, there is no notable difference between power in species  
293 richness within or outside the tropics, across the Americas. However, at wavelengths  $\lesssim 1000$  km, there

294 is significantly greater power for regions within the tropics. This trend arises because power spectral  
295 slopes remain close to  $-2$  at shorter wavelengths outside of the tropics (i.e. red noise; Supporting  
296 Information Figure 19), before increasing to be closer to  $-1$  (i.e. pink noise). We suggest that these  
297 results are consistent with the concept that topography in tropical regions can generate higher spe-  
298 cies richness towards the equator via the increased effectiveness of altitudinal variation in habitat at  
299 isolating species either physically or physiologically (i.e. by being associated with variation in other  
300 environmental variables such as temperature; Ghalambor *et al.*, 2006; Janzen, 1967). We find the  
301 effect has a greatest impact on species richness power of hummingbirds and amphibians; the impact  
302 on bats and songbirds richness appears to be more modest. Tropical increases in species richness of  
303 carnivorans, and mammals more generally, are much more subdued (Supporting Information Figure  
304 19).

305

306 Elevational transects exhibit red and pink noise spectral characteristics at wavelengths  $\gtrsim 10^3$  km  
307 and  $\lesssim 10^3$  km, respectively, which we note is similar to distance-averaged power from wavelet trans-  
308 forms of longitudinal river profiles and other topographic transects (Supporting Information Figures 9g,  
309 9q, 10g, 10q; Roberts *et al.*, 2019; Wapenhans *et al.*, 2021). Precipitation rate, temperature and annual  
310 temperature range can also be characterized as red and pink noise (Supporting Information Figures  
311 9h–j, r–t & 10h–j, r–t). Similar results are obtained for latitudinal transects through Africa, Eurasia  
312 and Australia, as well as across global, latitudinally-averaged sections (see Supporting Information  
313 Figures 11–23).

### 314 **3.2 Coherence between Richness and Environment**

315 Visual inspection of Figure 2 indicates that there is strong, location- and scale-dependent, similarity  
316 between the wavelet transforms of transects through species richness and environmental variables. To  
317 quantify the strength of these relationships we calculate cross wavelet power, which identifies co-located  
318 high amplitudes in the location-scale domain, and wavelet coherence (see Materials and Methods). Fig-  
319 ure 3 shows results for carnivorans (which are similar to those for mammals generally), and amphibians  
320 (which are similar to those for bats, songbirds and hummingbirds). See Supporting Information Figure  
321 1–2 for analyses of those other taxa. Figure 3a shows cross wavelet power between species richness  
322 of carnivorans along transect A—A' and elevation. Almost no short-wavelength ( $< 10^3$  km) features  
323 are coherent above a 90% confidence limit. These short wavelength regions contain almost no cross  
324 wavelet power; 94% of all cross wavelet power is in the region of high coherence colored on Figure 3a,  
325 which accounts for 30% of the location-scale domain. 79% of the area of the cross wavelet spectrum  
326 that is significantly coherent resides at wavelengths  $\gtrsim 10^3$  km. Distance-averaged cross wavelet power  
327 for all parts of the power spectrum, not just those parts which are coherent above the 90% significance

328 threshold, is shown to the right of each panel, on a logarithmic scale. Full, unmasked, plots of cross  
329 wavelet power are shown in Supporting Information Figure 24. Masked and unmasked cross power  
330 plots for other transects and global latitudinal averages are shown in Supporting Information Figures  
331 25–32. Distance-averaged cross wavelet power between all taxa and environmental variables studied is  
332 shown in Supporting Information Figures 19–23, panels g–ad.

333

334 Cross wavelet power between amphibians and elevation is also highest at long wavelengths, al-  
335 though overall there is a smaller proportion of the two signals that is coherent: 78% of the plot region  
336 is masked in Figure 3e (gray regions). Only a small part of the cross wavelet transform for amphibians  
337 and elevation is coherent below wavelengths of  $\sim 5000$  km, and that part lies near the centre of the  
338 transect, i.e. within the tropics. Distance-averaged power outside the tropics, plotted to the right  
339 of Figure 3e as a gray curve, is an order of magnitude lower than within the tropics, especially at  
340 wavelengths  $\lesssim 3000$  km. This observation is in contrast to cross power between species richness of  
341 carnivorans and elevation, where there is almost no difference between the results within and outside  
342 of the tropics, across all scales. These results may indicate that carnivorans are less affected by “moun-  
343 tain passes” (*sensu* Janzen, 1967) in the tropics, compared with amphibians (cf. Antonelli *et al.*, 2018;  
344 Eronen *et al.*, 2015; Rahbek *et al.*, 2019; Rolland *et al.*, 2015). At wavelengths  $\sim 10^3$  km, carnivoran  
345 species richness is most coherent with elevation and mean annual temperature atop terrestrial plateaux  
346 (e.g. Rocky-Mountains-Colorado Plateau and Altiplano, between 4000 – 7000 km and 13,000 – 14,000  
347 km distance along transect A–A’, respectively; Figures 1–3). An obvious interpretation is the local  
348 importance of tectonics for determining biodiversity (Antonelli *et al.*, 2018).

349

350 Statistically significant (above background red noise), coherent cross wavelet power between carni-  
351 voran species richness, mean annual precipitation rate, temperature and annual temperature range is  
352 shown in Figure 3b–d. Results for amphibians are shown in panels f–h. Cross power between amphi-  
353 bian species richness and precipitation rate, temperature, and temperature range tends to be higher  
354 within the tropics compared to outside the tropics at wavelengths  $\lesssim 3000$  km (cf. grey, blue, black  
355 lines in Figure 3). Those differences are absent or reduced for carnivorans. Furthermore, a smaller area  
356 of the power spectra of these three climatic variables is significantly coherent with carnivoran richness,  
357 compared to amphibian richness (cf. extent of gray masks in Figure 3). One likely interpretation of  
358 these results is that carnivorans are less sensitive to changes in those variables than amphibians (e.g.  
359 Rolland *et al.*, 2018). Calculated phase indicates long-wavelength anticorrelation between elevation  
360 and species richness for both carnivorans and amphibians (left-pointing arrows in Figure 3a and e;  
361 phase angle,  $a = \pi$ ; see Materials and Methods). Highly coherent long-wavelength anticorrelation  
362 between amphibian species richness and annual temperature range is also observed across the entire  
363 transect. Highly coherent, long-wavelength cross power between precipitation rate or temperature,

364 and species richness of both carnivorans and amphibians, is in phase, i.e. there is positive correlation  
365 at these scales. This result is in agreement with the idea that faster diversification rates contribute  
366 to heightened species richness, since it suggests that both taxonomic groups benefit from increased  
367 energy and higher productivity associated with greater availability of heat and water (cf. Allen *et al.*,  
368 2006).

369

### 370 **3.3 Global and Local Species Richness and Environment**

371 These results for the Americas can be compared to transects from Australia, Eurasia and Africa. For  
372 Australia, similar trends in power spectral slopes, distance-averaged power and cross wavelet power  
373 are observed (Figure 1: B—B'; Supporting Information Figures 4, 11–12, 20, 25–26). However, for  
374 Australia there is almost no difference in power or cross power between tropical regions and regions  
375 outside the tropics. We note, however, that the Australian transect does not include the entirety of  
376 the tropics; it only spans latitudes between 11.2°S–37.6°S. Signals are mostly coherent at wavelengths  
377  $\gtrsim 10^3$  km, and the same pattern of correlation/anticorrelation is observed with climatic variables as  
378 that recovered for the Americas (Supporting Information Figures 25–26). In Africa, songbirds and  
379 amphibians have greater species richness power within the tropics but the differences outside of the  
380 tropics are not as stark as for the Americas (Figure 1: C—C'; Supporting Information Figure 21a–f).  
381 This result may reflect differences in Cenozoic paleoclimatic history between Africa and the Americas  
382 (Hagen *et al.*, 2021). The greatest difference between cross power within and outside the tropics is for  
383 precipitation rate, suggesting that water availability is a more important control species richness for all  
384 African taxa studied here. Wavelet coherence indicates that, across Africa, carnivoran species richness  
385 does not correlate with environmental variables, whereas species richness of amphibians is strongly  
386 positively correlated with precipitation rate at long wavelengths, in agreement with the findings of  
387 Buckley & Jetz (2007). Anticorrelation is observed between amphibian species richness and temper-  
388 ature across Africa. Results for Eurasia are dominated by the presence of the Tibetan Plateau, and  
389 the low proportion of the transect within tropical latitudes (Figure 1: D—D'; Supporting Information  
390 Figures 6, 15–16, 22, 29–30). Similar trends to the Americas are observed, albeit with generally lower  
391 cross power and coherence.

392

393 Mean terrestrial values of each variable across all latitudes globally were transformed into the  
394 location-scale domain. Distance-averaged wavelet power spectra of the resulting transects have spec-  
395 tral slopes between  $-2$  and  $-1$  (red to pink noise), reflecting the importance of long-wavelength trends.  
396 Species richness power for all taxa, except Mammalia and Carnivora, is at least an order of magnitude  
397 lower outside of tropical latitudes, at wavelengths  $\lesssim 3000$  km, consistent with results obtained from

398 transforming the American transect (Figures 2 and 3). This result suggests that the increase in species  
399 richness power at short wavelengths may be a global phenomenon, reflecting sensitivity of tropical  
400 species to local climatic effects.

401

402 Figure 4a–f shows a summary of results for the transect across the Americas, A—A'. Panels a and  
403 b show inverse wavelet transforms generated using only the the longest 20% of scales (wavelengths  
404  $\gtrsim 3750$  km; approximately one quarter of the length of the transect), for amphibian and carnivoran  
405 species richness respectively. Those taxa have significantly different modes of life and their wavelet  
406 power, cross power and coherence with environment exhibit the greatest differences of any taxa stud-  
407 ied. These low-pass filtered series account for  $\sim 41$  and  $\sim 11\%$  of species richness in terms of mean  
408 difference to input, respectively. Figure 4c–f shows inverse wavelet transforms of environmental series  
409 filtered in the same way. Coherence,  $R_n^2$ , between the filtered series and amphibian (green) and carni-  
410 voran (purple) species richness trends is annotated on each panel. These results for the Americas are  
411 consistent with global averages, although coherence is generally lower for global results since regions  
412 of common power may not be generated at the same longitudes (see Figure 4g–l).

413

### 414 3.4 Transfer Functions Between Environment and Species Richness

415 It is useful to derive ‘rules-of-thumb’ to estimate species richness from environmental variables. This  
416 study indicates that such conversion schemes (transfer functions) are likely to be particularly useful  
417 at large scales where most species richness appears to be determined, and where coherence with  
418 environmental variables is highest. In the scale-distance domain, after wavelet transformation (see  
419 Methods and Materials), species richness  $W$  of any given taxon  $X$  can be expressed:

$$W^X(x, s) = Z^{X\epsilon}(x, s) \cdot \epsilon(x, s) + \eta, \quad (5)$$

420 where  $x$  is distance,  $s$  is scale, and  $\eta$  is noise or contributions from variables that have not been  
421 considered.  $Z^{X\epsilon}$  refers to the admittance (transfer function) between a set of environmental variables  $\epsilon$ ,  
422 and richness in the scale-distance domain,  $W^X$ . For any individual variable  $Y$  within  $\epsilon$ , the admittance  
423 between  $W^X$  and  $W^Y$  can be expressed:

$$Z^{XY}(x, s) = \frac{W^X W^{Y*}}{W^Y W^{Y*}}, \quad (6)$$

424 where  $*$  denotes complex conjugate. Thereby, a species richness signal  $X$  can be estimated from  
425 calibrated admittance  $Z^{XY}$ , by convolving the inverse transform of  $Z^{XY}$  with  $Y$  (see Methods and  
426 Materials; Torrence & Compo, 1998).

427

428 Table 1 and Figure 4 show estimates of admittance between environmental variables and amphibian  
 429 and carnivoran richness series for the largest 25% of scales (wavelengths  $\geq 3756$  km). The mean of  
 430 the transfer function between mean annual precipitation (i.e.  $W^Y$ ) and amphibian richness ( $W^X$ ) in  
 431 the Americas, for example, is  $12.7_{-3.2}^{+5.3}$  spx/m. These scales account for  $\gtrsim 60\%$  of observed amphibian  
 432 species richness. Stated uncertainties are distances to 1<sup>st</sup> and 3<sup>rd</sup> quartiles of admittance values, across  
 433 all  $(x, s)$  space for  $s \geq 3756$  km. Calculated admittance is most likely to be a reliable rule of thumb  
 434 for converting environmental variable values into species richness when coherence is high. In Table  
 435 1, bold values indicate values where coherence is  $> 0.5$ . For example, consider the mean large-scale  
 436 coherence between amphibian richness and precipitation, which is  $0.76 \pm 0.2$ . This result, coupled  
 437 with the associated high positive admittance value, is suggestive of amphibian richness dependence on  
 438 large-scale precipitation patterns. Compare that result to the relatively low mean large-scale coher-  
 439 ence between American carnivoran richness and annual temperature range, which is only  $0.22 \pm 0.2$ ,  
 440 reflecting their likely independence. A comparison with results generated using global mean species  
 441 richness and environmental variables indicates that these rules are generally applicable (see Table 1  
 442 & Figure 4). Such simple rules-of-thumb appear to provide a means to predict species richness from  
 443 external variables at large ( $\gtrsim 1000$  km) scales.

444

**Table 1: Rules of thumb to convert values of environmental variables into species richness.**  $E$  = elevation,  $Pn$  = mean annual precipitation,  $Tm$  = mean annual temperature,  $\Delta T$  = annual temperature range (see Figures 1–2).  $Z$  = admittance (transfer function) between environmental variables and species richness at large scales ( $> 3756$  km); subscripts  $AA$  &  $MA$  indicate American amphibians & mammals; subscripts  $AG$  &  $MG$  indicate global amphibians & mammals; units are spx/km, spx/m or spx/ $^{\circ}$ C, where spx = species per pixel.  $R_n^2$  = coherence between environmental variable and species; bold = admittance and coherence values for species-variable relationships with mean  $R_n^2 > 0.5$

| Variable                  | $Z_{AA}$                               | $R_n^2$                          | $Z_{MA}$             | $R_n^2$                          | $Z_{AG}$              | $R_n^2$        | $Z_{MG}$                               | $R_n^2$                          |
|---------------------------|----------------------------------------|----------------------------------|----------------------|----------------------------------|-----------------------|----------------|----------------------------------------|----------------------------------|
| $E$ , km                  | $-7.6_{-2.5}^{+3.0}$                   | <b><math>0.52 \pm 0.3</math></b> | $-1.7_{-1.1}^{+0.6}$ | <b><math>0.62 \pm 0.2</math></b> | $2.5_{-17.7}^{+15.5}$ | $0.14 \pm 0.1$ | $-1.3_{-6.4}^{+5.5}$                   | $0.13 \pm 0.1$                   |
| $Pn$ , m                  | <b><math>12.7_{-3.2}^{+5.3}</math></b> | <b><math>0.76 \pm 0.2</math></b> | $2.5_{-0.9}^{+2.0}$  | <b><math>0.51 \pm 0.2</math></b> | $14.0_{-7.5}^{+10.1}$ | $0.41 \pm 0.2$ | $1.8_{-2.5}^{+2.2}$                    | $0.21 \pm 0.2$                   |
| $Tm$ , $^{\circ}$ C       | $0.9_{-1.0}^{+0.8}$                    | $0.31 \pm 0.2$                   | $0.2_{-0.3}^{+0.2}$  | $0.28 \pm 0.2$                   | $-0.4_{-2.3}^{+3.0}$  | $0.46 \pm 0.2$ | <b><math>-0.3_{-0.5}^{+0.7}</math></b> | <b><math>0.55 \pm 0.3</math></b> |
| $\Delta T$ , $^{\circ}$ C | $-0.4_{-0.5}^{+0.9}$                   | $0.26 \pm 0.3$                   | $-0.1_{-0.1}^{+0.3}$ | $0.22 \pm 0.2$                   | $-0.7_{-0.7}^{+0.7}$  | $0.28 \pm 0.2$ | $0.0_{-0.2}^{+0.1}$                    | $0.29 \pm 0.2$                   |

### 445 3.5 Drivers of Species Richness

446 In the introduction of this paper we described five hypotheses to test. First, we hypothesized that  
 447 species richness is highly coherent with environmental variables across all scales. Given the spectral  
 448 analyses we present, which indicate that most species richness does not have statistically significant co-  
 449 herence with environmental variables at wavelengths  $\lesssim 1000$  km at most latitudes, this hypothesis can  
 450 be rejected. Our second hypothesis—species richness is most coherent with external variability at small

451 scales—is also thus rejected. Our third hypothesis—species richness is most coherent with changes in  
452 environment at large scales—was found to be reasonable. Generally, our results indicate that species  
453 richness is most coherent with environment at wavelengths  $\gtrsim 10^3$  km, where highest species richness  
454 power also resides. Our fourth hypothesis—that coherence of species richness with external variables  
455 depends on taxonomic group—was also found to be reasonable. For example, amphibian richness is  
456 found to be highly coherent with temperature range at scales  $> 5000$  km, whereas carnivoran richness  
457 has very low coherence at these scales (cf. Figure 3d and 3h). Furthermore, amphibian richness seems  
458 to be more coherent with precipitation and temperature within the tropics, while carnivoran richness  
459 is not. Our fifth and final hypothesis—that species richness does not directly depend on environment,  
460 instead, species richness depends upon biotic interactions—requires modification. Species richness was  
461 found to have both high and low coherence with environmental variables, depending on location, scale  
462 and the environmental variable being considered. We have shown that wavelet transformation provides  
463 a means to identify coherence in the space-frequency domains. Our preliminary assessment of species-  
464 species interactions indicates that their coherence is also scale- and location-dependent (Supporting  
465 Information Figure 2). However, we note that calculated coherence and cross power between species  
466 tends to be lower than that between species and environmental variables. We note that historical  
467 effects, i.e. speciation/extinction rates over geologic time, are not identified within this study, solely  
468 modern correlations between variables, although long-term speciation/extinction rates may themselves  
469 depend on environment (e.g. Skeels *et al.*, 2022). Nonetheless, we tentatively suggest that these res-  
470 ults indicate that environment is more important in determining species richness than species-species  
471 interactions.

472

### 473 **3.6 Implications for Macroecological Biodiversity Patterns**

474 A principal result of this study is that terrestrial species richness tends to be most coherent with  
475 topography, precipitation and temperature at long wavelengths ( $> 10^3$  km). These results indicate  
476 that large-scale variation in tectonic and climatic processes play a governing role in generating the  
477 latitudinal diversity gradient (Field *et al.*, 2009). However, our results also indicate that the distri-  
478 bution of taxa, and their coherence and phase with environmental variables, is highly location- and  
479 scale-dependent. For example, whereas carnivorans and amphibians are in phase and coherent with  
480 mean annual precipitation and temperature at wavelengths  $> 10^4$  km, that is not true at smaller scales  
481 (i.e. shorter wavelengths). Significant deviations from the latitudinal diversity gradient indicate that  
482 external variables such as elevation, climatic patterns and tectonic history, play important roles in  
483 determining biodiversity at specific locations and scales (e.g. Archibald *et al.*, 2010, 2013; Hagen *et al.*,  
484 2021; Jones *et al.*, 2022; Mannion *et al.*, 2014; Saupe, 2021; Song *et al.*, 2020; Yasuhara *et al.*, 2017).

485

486 Spectral analyses highlight the importance of the tropics for biodiversity, in particular for amphi-  
487 bians, for which local changes in elevation and mean annual temperature (but not annual temperature  
488 range) are highly coherent with species richness. These results are consistent with the idea that in-  
489 creased resource availability in the tropics may generate higher primary productivity, supporting a  
490 greater number of individuals within a given area (i.e. higher carrying capacity), and therefore a  
491 greater number of different species (e.g. Fritz *et al.*, 2016; Gillman *et al.*, 2015; Hawkins *et al.*, 2003;  
492 Kessler *et al.*, 2014). Our results support the suggestion that elevated topography at the tropics is  
493 more likely to result in increased species diversity when compared to higher latitudes (Ghalambor  
494 *et al.*, 2006; Janzen, 1967; Polato *et al.*, 2018). However, this trend is not uniformly observed across  
495 taxa and for all continents. Species richness of carnivorans, for example, has no significant coherence  
496 with elevation or temperature range in the tropics, which suggests that this group is largely unaf-  
497 fected by the challenges posed by tropical mountain ranges. This might reflect the group's relatively  
498 unusual biogeographical history and seemingly high dispersal ability, with carnivorans originating at  
499 high latitudes and dispersing into the tropics, with net diversification rates comparable in tropical  
500 and temperate regions (Rolland *et al.*, 2015). Power spectral slopes for such taxa are steeper (more  
501 negative) at shorter wavelengths, whereas more environmentally-sensitive taxa, such as hummingbirds  
502 and amphibians, have shallower spectral slopes at longer wavelengths within tropical latitudes.

503

504 Cross wavelet power and coherence indicate that species richness is decoupled from short wavelength  
505 ( $\lesssim 10^3$  km) changes in elevation, temperature, annual temperature range and precipitation at nearly  
506 all locations, except for certain taxa within the tropics. Locally, uplifted topography can be highly co-  
507 herent with species richness. Trends across the Americas are reflected in global, latitudinally-averaged,  
508 transects and for other continents. In general, the species richness of taxa such as hummingbirds and  
509 amphibians is strongly and positively correlated with precipitation rate and temperature, except in  
510 Africa, where high temperatures may limit availability of water.

511

### 512 3.7 Conclusions

513 In summary, wavelet power spectral analysis provides insight into the coherence between species rich-  
514 ness and environmental variables. Species richness is shown to vary as a function of location and scale.  
515 Comparisons with topography, temperature and precipitation show that species richness tends to be  
516 highly coherent with external forcing at large scales (wavelengths  $> 10^4$  km). Phase difference between  
517 signals reveals that species richness is in-phase with precipitation and temperature, and anti-phase with  
518 elevation and annual temperature range, at these scales. However, these relationships are dependent



519 on scale and taxon. At smaller scales, richness of bats, songbirds, hummingbirds and amphibians tends  
520 to be greatest in the tropics, where calculated coherence highlights the importance of topography and  
521 temperature range for determining species richness. Carnivorans, in contrast, show little coherence  
522 with environmental variables at these scales in the tropics. Instead, they are most coherent in the  
523 vicinity of terrestrial plateaux, for example the Colorado Plateau and Altiplano. These observations  
524 suggest that large scale ( $> 10^3$  km) variations in environmental variables determine almost all of the  
525 distribution of terrestrial vertebrates. Smaller scale ( $\lesssim 10^3$  km) variation can play an important role  
526 locally, particularly within the tropics. These results highlight the general importance of environ-  
527 mental change at the scale of tens degrees of latitude for determining biodiversity. They also indicate  
528 that changes at smaller scales are comparatively more important in the tropics for determining species  
529 richness. Crucially, these results could be used to predict the changes in biodiversity that could arise  
530 from different future Earth climate change scenarios.

## 531 References

- 532 Albanese, D., Visintainer, R., Merler, S., Riccadonna, S., Jurman, G., & Furlanello, C., 2012. mlp:  
533 Machine Learning Python.
- 534 Allen, A. P., Gillooly, J. F., Savage, V. M., & Brown, J. H., 2006. Kinetic effects of temperature on  
535 rates of genetic divergence and speciation, *PNAS*, **103**(24), 9130–9135.
- 536 Amante, C. & Eakins, B. W., 2009. ETOPO1 Arc-minute global relief model: Procedures, data sources  
537 and analysis, Tech. rep., NOAA, Boulder, Colorado.
- 538 Antonelli, A., Kissling, W. D., Flantua, S. G. A., Bermúdez, M. A., Mulch, A., Muellner-Riehl,  
539 A. N., Kreft, H., Linder, H. P., Badgley, C., Fjeldså, J., Fritz, S. A., Rahbek, C., Herman, F.,  
540 Hooghiemstra, H., & Hoorn, C., 2018. Geological and climatic influences on mountain biodiversity,  
541 *Nature Geoscience*, **11**, 718–725.
- 542 Araújo, M. B. & Rahbek, C., 2006. How Does Climate Change Affect Biodiversity?, *Science*, **313**,  
543 1396–1397.
- 544 Archibald, S. B., Bossert, W. H., Greenwood, D. R., & Farrell, B. D., 2010. Seasonality, the latitudinal  
545 gradient of diversity, and Eocene insects, *Paleobiology*, **36**(3), 374–398.
- 546 Archibald, S. B., Greenwood, D. R., & Mathewes, R. W., 2013. Seasonality, montane beta diversity,  
547 and Eocene insects: Testing Janzen’s dispersal hypothesis in an equable world, *Palaeogeography*,  
548 *Palaeoclimatology, Palaeoecology*, **371**, 1–8.

- 549 Balmford, A. & Bond, W., 2005. Trends in the state of nature and their implications for human  
550 well-being, *Ecology Letters*, **8**(11), 1218–1234.
- 551 Barrett, C. B., Travis, A. J., & Dasgupta, P., 2011. On biodiversity conservation and poverty traps,  
552 *PNAS*, **108**(34), 13907–13912.
- 553 Belmaker, J. & Jetz, W., 2011. Cross-scale variation in species richness-environment associations,  
554 *Global Ecology and Biogeography*, **20**(3), 464–474.
- 555 BirdLife International NatureServe, 2011. Bird Species Distribution Maps of the World, BirdLife In-  
556 ternational, Cambridge, UK.
- 557 Buckley, L. B. & Jetz, W., 2007. Environmental and historical constraints on global patterns of am-  
558 phibian richness, *Proceedings of the Royal Society B*, **274**, 1167–1173.
- 559 Buckley, L. B., Hurlbert, A. H., & Jetz, W., 2012. Broad-scale ecological implications of ectothermy  
560 and endothermy in changing environments, *Global Ecology and Biogeography*, **21**(9), 873–885.
- 561 Carl, G., Dormann, C. F., & Kühn, I., 2008. A wavelet-based method to remove spatial autocorrelation  
562 in the analysis of species distributional data, *Web Ecology*, pp. 22–29.
- 563 Carl, G., Doktor, D., Schweiger, O., & Kühn, I., 2016. Assessing relative variable importance across  
564 different spatial scales: a two-dimensional wavelet analysis, *Journal of Biogeography*, **43**(12), 2502–  
565 2512.
- 566 Chaudhary, C., Richardson, A. J., Schoeman, D. S., & Costello, M. J., 2021. Global warming is causing  
567 a more pronounced dip in marine species richness around the equator, *PNAS*, **118**(15), 1–6.
- 568 Corenblit, D., Baas, A. C., Bornette, G., Darrozes, J., Delmotte, S., Francis, R. A., Gurnell, A. M., Ju-  
569 lien, F., Naiman, R. J., & Steiger, J., 2011. Feedbacks between geomorphology and biota controlling  
570 Earth surface processes and landforms: A review of foundation concepts and current understandings,  
571 *Earth-Science Reviews*, **106**(3-4), 307–331.
- 572 Dee, D. P., Uppala, S. M., Simmons, A. J., Berrisford, P., Poli, P., Kobayashi, S., Andrae, U.,  
573 Balmaseda, M. A., Balsamo, G., Bauer, P., Bechtold, P., Beljaars, A. C., van de Berg, L., Bidlot,  
574 J., Bormann, N., Delsol, C., Dragani, R., Fuentes, M., Geer, A. J., Haimberger, L., Healy, S. B.,  
575 Hersbach, H., Hólm, E. V., Isaksen, I., Kållberg, P., Köhler, M., Matricardi, M., McNally, A. P.,  
576 Monge-Sanz, B. M., Morcrette, J. J., Park, B. K., Peubey, C., de Rosnay, P., Tavolato, C., Thépaut,  
577 J. N., & Vitart, F., 2011. The ERA-Interim reanalysis: Configuration and performance of the data  
578 assimilation system, *Quarterly Journal of the Royal Meteorological Society*, **137**(656), 553–597.

- 579 Dormann, C. F., McPherson, J. M., Araújo, M. B., Bivand, R., Bollinger, J., Carl, G., Davies, R. G.,  
580 Hirzel, A., Jetz, W., Kissling, W. D., Kühn, I., Ohlemüller, R., Peres-Neto, P. R., Reineking, B.,  
581 Schröder, B., Schurr, F. M., & Wilson, R., 2007. Methods to account for spatial autocorrelation in  
582 the analysis of species distributional data: A review, *Ecography*, **30**(5), 609–628.
- 583 Eronen, J. T., Janis, C. M., Chamberlain, C. P., & Mulch, A., 2015. Mountain uplift explains differences  
584 in Palaeogene patterns of mammalian evolution and extinction between North America and Europe,  
585 *Proceedings of the Royal Society B: Biological Sciences*, **282**(20150136), 1–8.
- 586 Fei, S., Phillips, J., & Shouse, M., 2014. Biogeomorphic impacts of invasive species, *Annual Review of*  
587 *Ecology, Evolution, and Systematics*, **45**, 69–87.
- 588 Field, R., Hawkins, B. A., Cornell, H. V., Currie, D. J., Diniz-Filho, J. A. F., Guégan, J.-F., Kaufman,  
589 D. M., Kerr, J. T., Mittelbach, G. G., Oberdorff, T., O'Brien, E. M., & Turner, J. R. G., 2009.  
590 Spatial species-richness gradients across scales: A meta-analysis, *Journal of Biogeography*, **36**(1),  
591 132–147.
- 592 Fritz, S. A., Eronen, J. T., Schnitzler, J., Hof, C., Janis, C. M., Mulch, A., Böhning-Gaese, K., &  
593 Graham, C. H., 2016. Twenty-million-year relationship between mammalian diversity and primary  
594 productivity, *PNAS*, **113**(39), 10908–10913.
- 595 Gaston, K. J., 2000. Global patterns in biodiversity, *Nature*, **405**(6783), 220–227.
- 596 Ghalambor, C. K., Huey, R. B., Martin, P. R., Tewksbury, J. J., & Wang, G., 2006. Are mountain  
597 passes higher in the tropics? Janzen's hypothesis revisited, *Integrative and Comparative Biology*,  
598 **46**(1), 5–17.
- 599 Gillman, L. N., Wright, S. D., Cusens, J., McBride, P. D., Malhi, Y., & Whittaker, R. J., 2015.  
600 Latitude, productivity and species richness, *Global Ecology and Biogeography*, **24**(1), 107–117.
- 601 Goddard Earth Sciences Data and Information Services Center, 2017. TRMM (TMPA/3B43) Rainfall  
602 Estimate L3 1 Month 0.25 Degree x 0.25 Degree V7.
- 603 Grinsted, A., Moore, J. C., & Jevrejeva, S., 2004. Application of the cross wavelet transform and  
604 wavelet coherence to geophysical time series, *Nonlinear Processes in Geophysics*, **11**(5/6), 561–566.
- 605 Hagen, O., Skeels, A., Onstein, R. E., Jetz, W., & Pellissier, L., 2021. Earth history events shaped the  
606 evolution of biodiversity across tropical rainforests, *PNAS*, **118**(40), 1–11.
- 607 Hampe, A. & Petit, R. J., 2005. Conserving biodiversity under climate change: The rear edge matters,  
608 *Ecology Letters*, **8**(5), 461–467.

- 609 Hawkins, B. A., Porter, E. E., & Diniz-Filho, J. A. F., 2003. Productivity and history as predictors of  
610 the latitudinal diversity gradient of terrestrial birds, *Ecology*, **84**(6), 1608–1623.
- 611 Hijmans, R. J., Cameron, S. E., Parra, J. L., Jones, P. G., & Jarvis, A., 2005. Very high resolution  
612 interpolated climate surfaces for global land areas, *International Journal of Climatology*, **25**(15),  
613 1965–1978.
- 614 Hillebrand, H., 2004. On the generality of the latitudinal diversity gradient, *American Naturalist*,  
615 **163**(2), 192–211.
- 616 Hurlbert, A. H. & Jetz, W., 2007. Species richness, hotspots, and the scale dependence of range maps  
617 in ecology and conservation, *PNAS*, **104**(33), 13384–13389.
- 618 International Union for Conservation of Nature, 2021. The IUCN Red List of Threatened Species.
- 619 Janzen, D. H., 1967. Why Mountain Passes are Higher in the Tropics, *The American Naturalist*,  
620 **101**(919), 233–249.
- 621 Jarvis, A., Reuter, H. I., Nelson, A., & Guevara, E., 2008. Hole-filled seamless SRTM data V4.
- 622 Jenkins, C. N. & Joppa, L., 2009. Expansion of the global terrestrial protected area system, *Biological*  
623 *Conservation*, **142**(10), 2166–2174.
- 624 Jenkins, C. N., Pimm, S. L., & Joppa, L. N., 2013. Global patterns of terrestrial vertebrate diversity  
625 and conservation, *PNAS*, **110**(28), E2603–E2610.
- 626 Jenkins, J., Stephenson, S. N., Martínez-Garzón, P., Bohnhoff, M., & Nurlu, M., 2020. Crustal Thick-  
627 ness Variation Across the Sea of Marmara Region, NW Turkey: A Reflection of Modern and Ancient  
628 Tectonic Processes, *Tectonics*, **39**(7), 1–18.
- 629 Jones, L. A., Mannion, P. D., Farnsworth, A., Bragg, F., & Lunt, D. J., 2022. Climatic and tectonic  
630 drivers shaped the tropical distribution of coral reefs, *Nature Communications*, **13**(3120), 1–10.
- 631 Karger, D. N., Conrad, O., Böhrner, J., Kawohl, T., Kreft, H., Soria-Auza, R. W., Zimmermann, N. E.,  
632 Linder, H. P., & Kessler, M., 2017. Climatologies at high resolution for the earth’s land surface  
633 areas, *Scientific Data*, **4**(170122), 1–20.
- 634 Kass, J. M., Guénard, B., Dudley, K. L., Jenkins, C. N., Azuma, F., Fisher, B. L., Parr, C. L., Gibb,  
635 H., Longino, J. T., Ward, P. S., Chao, A., Lubertazzi, D., Weiser, M., Jetz, W., Guralnick, R.,  
636 Blatrix, R., Des Lauriers, J., Donoso, D. A., Georgiadis, C., Gomez, K., Hawkes, P. G., Johnson,  
637 R. A., Lattke, J. E., MacGown, J. A., Mackay, W., Robson, S., Sanders, N. J., Dunn, R. R., &  
638 Economo, E. P., 2022. The global distribution of known and undiscovered ant biodiversity, *Science*  
639 *Advances*, **9908**, 1–16.

- 640 Keil, P. & Chase, J. M., 2019. Global patterns and drivers of tree diversity integrated across a con-  
641 tinuum of spatial grains, *Nature Ecology and Evolution*, **3**(3), 390–399.
- 642 Keitt, T. H., 2007. On the quantification of local variation in biodiversity scaling using wavelets, in  
643 *Scaling Biodiversity*, edited by D. Storch, P. Marquet, & J. Brown, chap. 9, pp. 168–180, Cambridge  
644 University Press.
- 645 Kessler, M., Salazar, L., Homeier, J., & Kluge, J., 2014. Species richness-productivity relationships of  
646 tropical terrestrial ferns at regional and local scales, *Journal of Ecology*, **102**(6), 1623–1633.
- 647 Krieger, S., Freij, N., Brazhe, A., Torrence, C., & Compo, G. P., 2020. *PyCWT: A Python module for*  
648 *continuous wavelet spectral analysis*.
- 649 Lawrimore, J. H., Menne, M. J., Gleason, B. E., Williams, C. N., Wuertz, D. B., Vose, R. S., & Rennie,  
650 J., 2011. An overview of the Global Historical Climatology Network monthly mean temperature data  
651 set, version 3, *Journal of Geophysical Research Atmospheres*, **116**(19), 1–18.
- 652 Liu, Y., Liang, X. S., & Weisberg, R. H., 2007. Rectification of the bias in the wavelet power spectrum,  
653 *Journal of Atmospheric and Oceanic Technology*, **24**(12), 2093–2102.
- 654 Ma, Z. & Zhang, L., 2015. Modeling bird species richness at multiple spatial scales using two-  
655 dimensional wavelet analysis, *Forest Science*, **61**(1), 1–16.
- 656 Mannion, P. D., Upchurch, P., Benson, R. B. J., & Goswami, A., 2014. The latitudinal biodiversity  
657 gradient through deep time, *Trends in Ecology and Evolution*, **29**(1), 42–50.
- 658 Marsh, C. J., Sica, Y. V., Burgin, C. J., Dorman, W. A., Anderson, R. C., del Toro Mijares, I.,  
659 Vigneron, J. G., Barve, V., Dombrowik, V. L., Duong, M., Guralnick, R., Hart, J. A., Maypole,  
660 J. K., McCall, K., Ranipeta, A., Schuerkmann, A., Torselli, M. A., Lacher, T., Mittermeier, R. A.,  
661 Rylands, A. B., Sechrest, W., Wilson, D. E., Abba, A. M., Aguirre, L. F., Arroyo-Cabrales, J., Astúa,  
662 D., Baker, A. M., Braulik, G., Braun, J. K., Brito, J., Busher, P. E., Burneo, S. F., Camacho, M. A.,  
663 Cavallini, P., de Almeida Chiquito, E., Cook, J. A., Cserkés, T., Csorba, G., Cuéllar Soto, E., da  
664 Cunha Tavares, V., Davenport, T. R. B., Deméré, T., Denys, C., Dickman, C. R., Eldridge, M.  
665 D. B., Fernandez-Duque, E., Francis, C. M., Frankham, G., Franklin, W. L., Freitas, T., Friend,  
666 J. A., Gadsby, E. L., Garbino, G. S. T., Gaubert, P., Giannini, N., Giarla, T., Gilchrist, J. S.,  
667 Gongora, J., Goodman, S. M., Gursky-Doyen, S., Hackländer, K., Hafner, M. S., Hawkins, M.,  
668 Helgen, K. M., Heritage, S., Hinckley, A., Hintsche, S., Holden, M., Holekamp, K. E., Honeycutt,  
669 R. L., Huffman, B. A., Humle, T., Hutterer, R., Ibáñez Ulargui, C., Jackson, S. M., Janecka,  
670 J., Janecka, M., Jenkins, P., Juškaitis, R., Juste, J., Kays, R., Kilpatrick, C. W., Kingston, T.,  
671 Koprowski, J. L., Kryštufek, B., Lavery, T., Lee, T. E., Leite, Y. L. R., Novaes, R. L. M., Lim,

- 672 B. K., Lissovsky, A., López-Antoñanzas, R., López-Baucells, A., MacLeod, C. D., Maisels, F. G.,  
673 Mares, M. A., Marsh, H., Mattioli, S., Meijaard, E., Monadjem, A., Morton, F. B., Musser, G.,  
674 Nadler, T., Norris, R. W., Ojeda, A., Ordóñez-Garza, N., Pardiñas, U. F. J., Patterson, B. D.,  
675 Pavan, A., Pennay, M., Pereira, C., Prado, J., Queiroz, H. L., Richardson, M., Riley, E. P., Rossiter,  
676 S. J., Rubenstein, D. I., Ruelas, D., Salazar-Bravo, J., Schai-Braun, S., Schank, C. J., Schwitzer,  
677 C., Sheeran, L. K., Shekelle, M., Shenbrot, G., Soisook, P., Solari, S., Southgate, R., Superina, M.,  
678 Taber, A. B., Talebi, M., Taylor, P., Thong, V. D., Ting, N., Tirira, D. G., Tsang, S., Turvey, S. T.,  
679 Valdez, R., Van Cakenberghe, V., Veron, G., Wallis, J., Wells, R., Whittaker, D., Williamson, E. A.,  
680 Wittemyer, G., Woinarski, J., Zinner, D., Upham, N. S., & Jetz, W., 2022. Expert range maps of  
681 global mammal distributions harmonised to three taxonomic authorities, *Journal of Biogeography*,  
682 **49**(5), 979–992.
- 683 Mori, A. S., Sasaki, T., Kagami, M., Miki, T., & Yasuhara, M., 2022. Feedbacks Between Biodiversity  
684 and Climate Change, in *The Ecological and Societal Consequences of Biodiversity Loss*, chap. 13,  
685 pp. 281–304, Princeton University Press.
- 686 Nogués-Bravo, D., Rodríguez-Sánchez, F., Orsini, L., de Boer, E., Jansson, R., Morlon, H., Fordham,  
687 D. A., & Jackson, S. T., 2018. Cracking the Code of Biodiversity Responses to Past Climate Change,  
688 *Trends in Ecology and Evolution*, **33**(10), 765–776.
- 689 Norris, R. D., Kirtland Turner, S., Hull, P. M., & Ridgwell, A., 2013. Marine ecosystem responses to  
690 Cenozoic global change, *Science*, **341**(6145), 492–498.
- 691 Palmer, M. W. & White, P. S., 1994. Scale Dependence and the Species-Area Relationship, *The*  
692 *American Naturalist*, **144**(5), 717–740.
- 693 Polato, N. R., Gill, B. A., Shah, A. A., Gray, M. M., Casner, K. L., Barthelet, A., Messer, P. W.,  
694 Simmons, M. P., Guayasamin, J. M., Encalada, A. C., Kondratieff, B. C., Flecker, A. S., Thomas,  
695 S. A., Ghalambor, C. K., Poff, N. L., Funk, W. C., & Zamudio, K. R., 2018. Narrow thermal tolerance  
696 and low dispersal drive higher speciation in tropical mountains, *PNAS*, **115**(49), 12471–12476.
- 697 Rahbek, C. & Graves, G. R., 2001. Multiscale assessment of patterns of avian species richness, *PNAS*,  
698 **98**(8), 4534–4539.
- 699 Rahbek, C., Borregaard, M. K., Colwell, R. K., Dalsgaard, B., Holt, B. G., Morueta-Holme, N.,  
700 Nogués-Bravo, D., Whittaker, R. J., & Fjeldså, J., 2019. Humboldt’s enigma: What causes global  
701 patterns of mountain biodiversity?, *Science*, **365**(6458), 1108–1113.
- 702 Roberts, G. G. & Mannion, P. D., 2019. Timing and periodicity of Phanerozoic marine biodiversity  
703 and environmental change, *Scientific Reports*, **9**(1), 6116.

- 704 Roberts, G. G., White, N., & Lodhia, B. H., 2019. The Generation and Scaling of Longitudinal River  
705 Profiles, *Journal of Geophysical Research: Earth Surface*, **124**, 17.
- 706 Rolland, J., Condamine, F. L., Beeravolu, C. R., Jiguet, F., & Morlon, H., 2015. Dispersal is a major  
707 driver of the latitudinal diversity gradient of Carnivora, *Global Ecology and Biogeography*, **24**(9),  
708 1059–1071.
- 709 Rolland, J., Silvestro, D., Schluter, D., Guisan, A., Broennimann, O., & Salamin, N., 2018. The impact  
710 of endothermy on the climatic niche evolution and the distribution of vertebrate diversity, *Nature*  
711 *Ecology and Evolution*, **2**(3), 459–464.
- 712 Saupe, E. E., 2021. Explanations for tropical diversity gradients are rooted in the deep past, *PNAS*,  
713 **118**(43), 1–3.
- 714 Schneider, U., Becker, A., Finger, P., Meyer-Christoffer, A., Ziese, M., & Rudolf, B., 2014. GPCC's  
715 new land surface precipitation climatology based on quality-controlled in situ data and its role in  
716 quantifying the global water cycle, *Theoretical and Applied Climatology*, **115**(1-2), 15–40.
- 717 Skeels, A., Bach, W., Hagen, O., Jetz, W., & Pellissier, L., 2022. Temperature-Dependent Evolution-  
718 ary Speed Shapes the Evolution of Biodiversity Patterns Across Tetrapod Radiations, *Systematic*  
719 *Biology*, pp. 1–16.
- 720 Song, H., Huang, S., Jia, E., Dai, X., Wignall, P. B., & Dunhill, A. M., 2020. Flat latitudinal diversity  
721 gradient caused by the Permian-Triassic mass extinction, *Proceedings of the National Academy of*  
722 *Sciences of the United States of America*, **117**(30), 17578–17583.
- 723 Storch, D., Marquet, P., & Brown, J., 2007. *Scaling Biodiversity*, Cambridge University Press.
- 724 Torrence, C. & Compo, G. P., 1998. A practical guide to wavelet analysis, *Bulletin of the American*  
725 *Meteorological Society*, **79**(1), 61–78.
- 726 Wapenhans, I., Fernandes, V. M., O'Malley, C., White, N., & Roberts, G. G., 2021. Scale-Dependent  
727 Contributors to River Profile Geometry, *Journal of Geophysical Research: Earth Surface*, **126**, 1–25.
- 728 Wessel, P., Luis, J., Uieda, L., Scharroo, R., Wobbe, F., Smith, W. H. F., & Tian, D., 2019. The  
729 Generic Mapping Tools Version 6, *Geochemistry, Geophysics, Geosystems*, **20**, 1–9.
- 730 Willig, M. R., Kaufman, D. M., & Stevens, R. D., 2003. Latitudinal Gradients of Biodiversity: Pattern,  
731 Process, Scale, and Synthesis, *Annual Review of Ecology, Evolution, and Systematics*, **34**, 273–309.
- 732 Yasuhara, M. & Deutsch, C. A., 2022. Paleobiology provides glimpses of future ocean, *Science*,  
733 **375**(6576), 25–26.

- 734 Yasuhara, M., Iwatani, H., Hunt, G., Okahashi, H., Kase, T., Hayashi, H., Irizuki, T., Aguilar, Y. M.,  
735 Fernando, A. G. S., & Renema, W., 2017. Cenozoic dynamics of shallow-marine biodiversity in the  
736 Western Pacific, *Journal of Biogeography*, **44**(3), 567–578.
- 737 Yasuhara, M., Huang, H.-H. M., Hull, P., Rillo, M. C., Condamine, F. L., Tittensor, D. P., Kučera,  
738 M., Costello, M. J., Finnegan, S., O’Dea, A., Hong, Y., Bonebrake, T. C., McKenzie, N. R., Doi, H.,  
739 Wei, C.-L., Kubota, Y., & Saupe, E. E., 2020. Time Machine Biology: Cross-Timescale Integration  
740 of Ecology, Evolution, and Oceanography, *Oceanography*, **33**(2), 17–28.
- 741 Yasuhara, M., Wei, C.-L., Kucera, M., Costello, M. J., Tittensor, D. P., Kiessling, W., Bonebrake,  
742 T. C., Tabor, C. R., Feng, R., Baselga, A., Kretschmer, K., Kusumoto, B., & Kubota, Y., 2020.  
743 Past and future decline of tropical pelagic biodiversity, *PNAS*, **117**(23), 12891–12896.



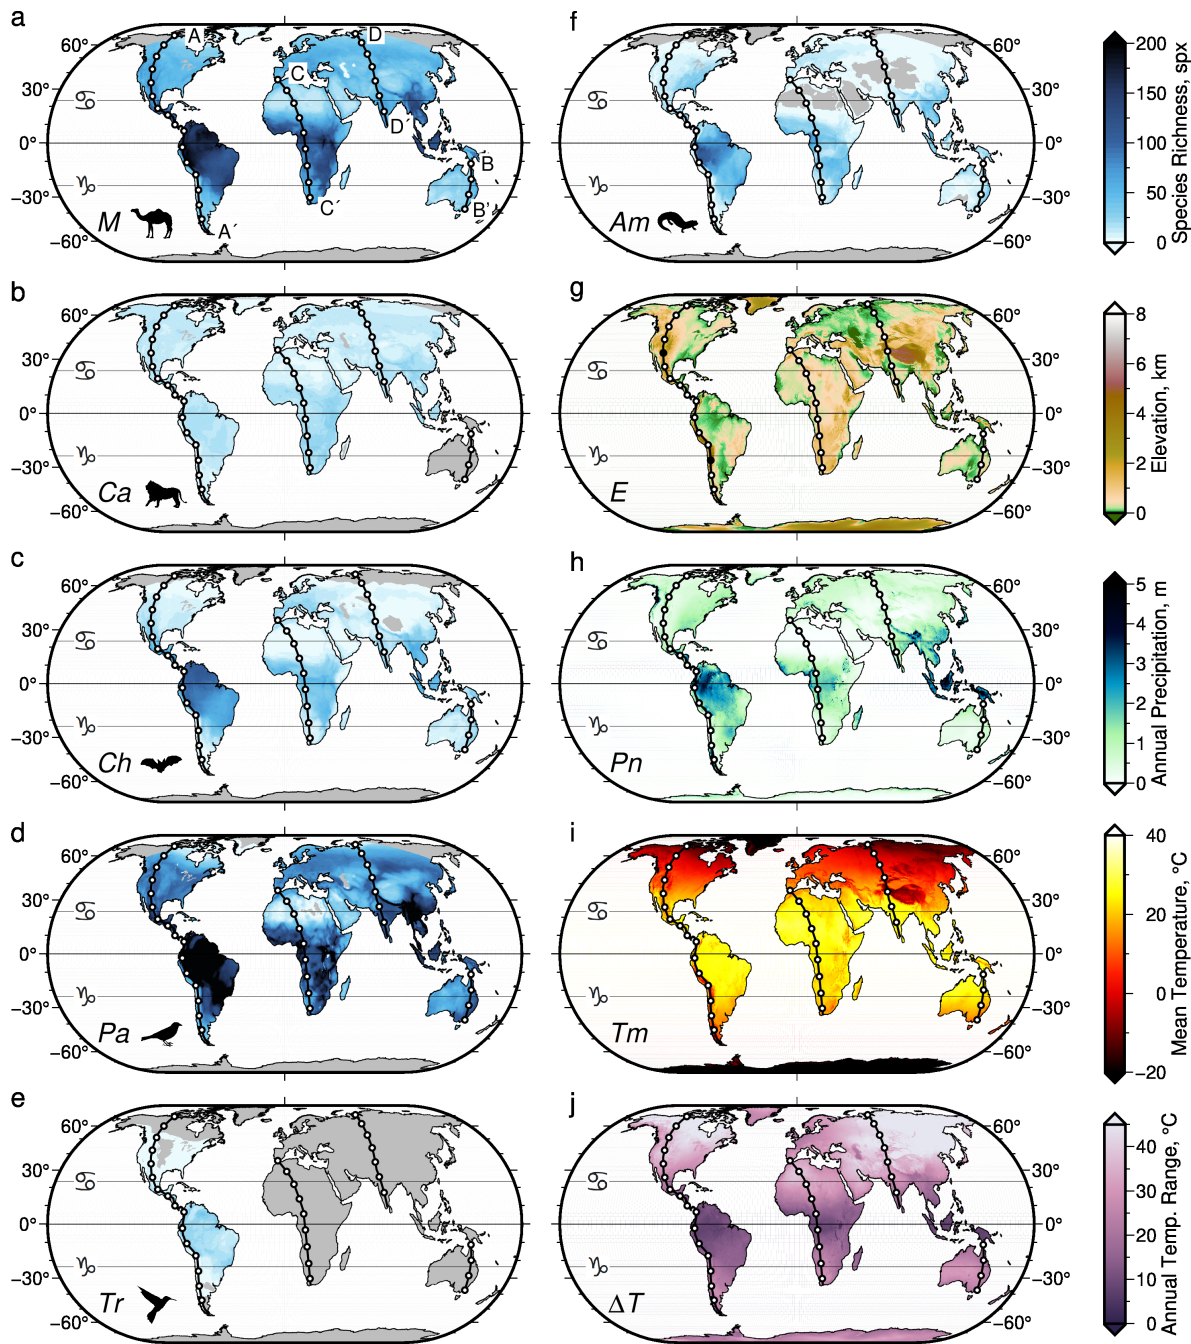

**Figure 1: Global patterns of species richness and environment.** (a) All Mammalia (*M*, mammals), (b) Carnivora (*Ca*, carnivorans), (c) Chiroptera (*Ch*, bats), (d) Passeriformes (*Pa*, songbirds), (e) Trochilidae (*Tr*, hummingbirds), (f) Amphibia (*Am*, amphibians); spx = species per 10×10 km pixel (Jenkins *et al.*, 2013); horizontal lines = Tropics of Cancer (northern), Capricorn (southern), and Equator; A—A' = transect through Americas investigated here; B—B', C—C', D—D' = transects investigated in Supporting Information. Global latitudinal mean transects also studied therein and in Figure 4. (g) Elevation (*E*) from ETOPO1 global model with horizontal resolution of 1 arc-minute (Amante & Eakins, 2009); filled circles on A—A' = Colorado Plateau/Mexican Highlands and Andean Altiplano. (h)–(j) Mean annual precipitation rate (*Pn*), temperature (*Tm*), and temperature range ( $\Delta T$ ) from 1981–2010 (Karger *et al.*, 2017).

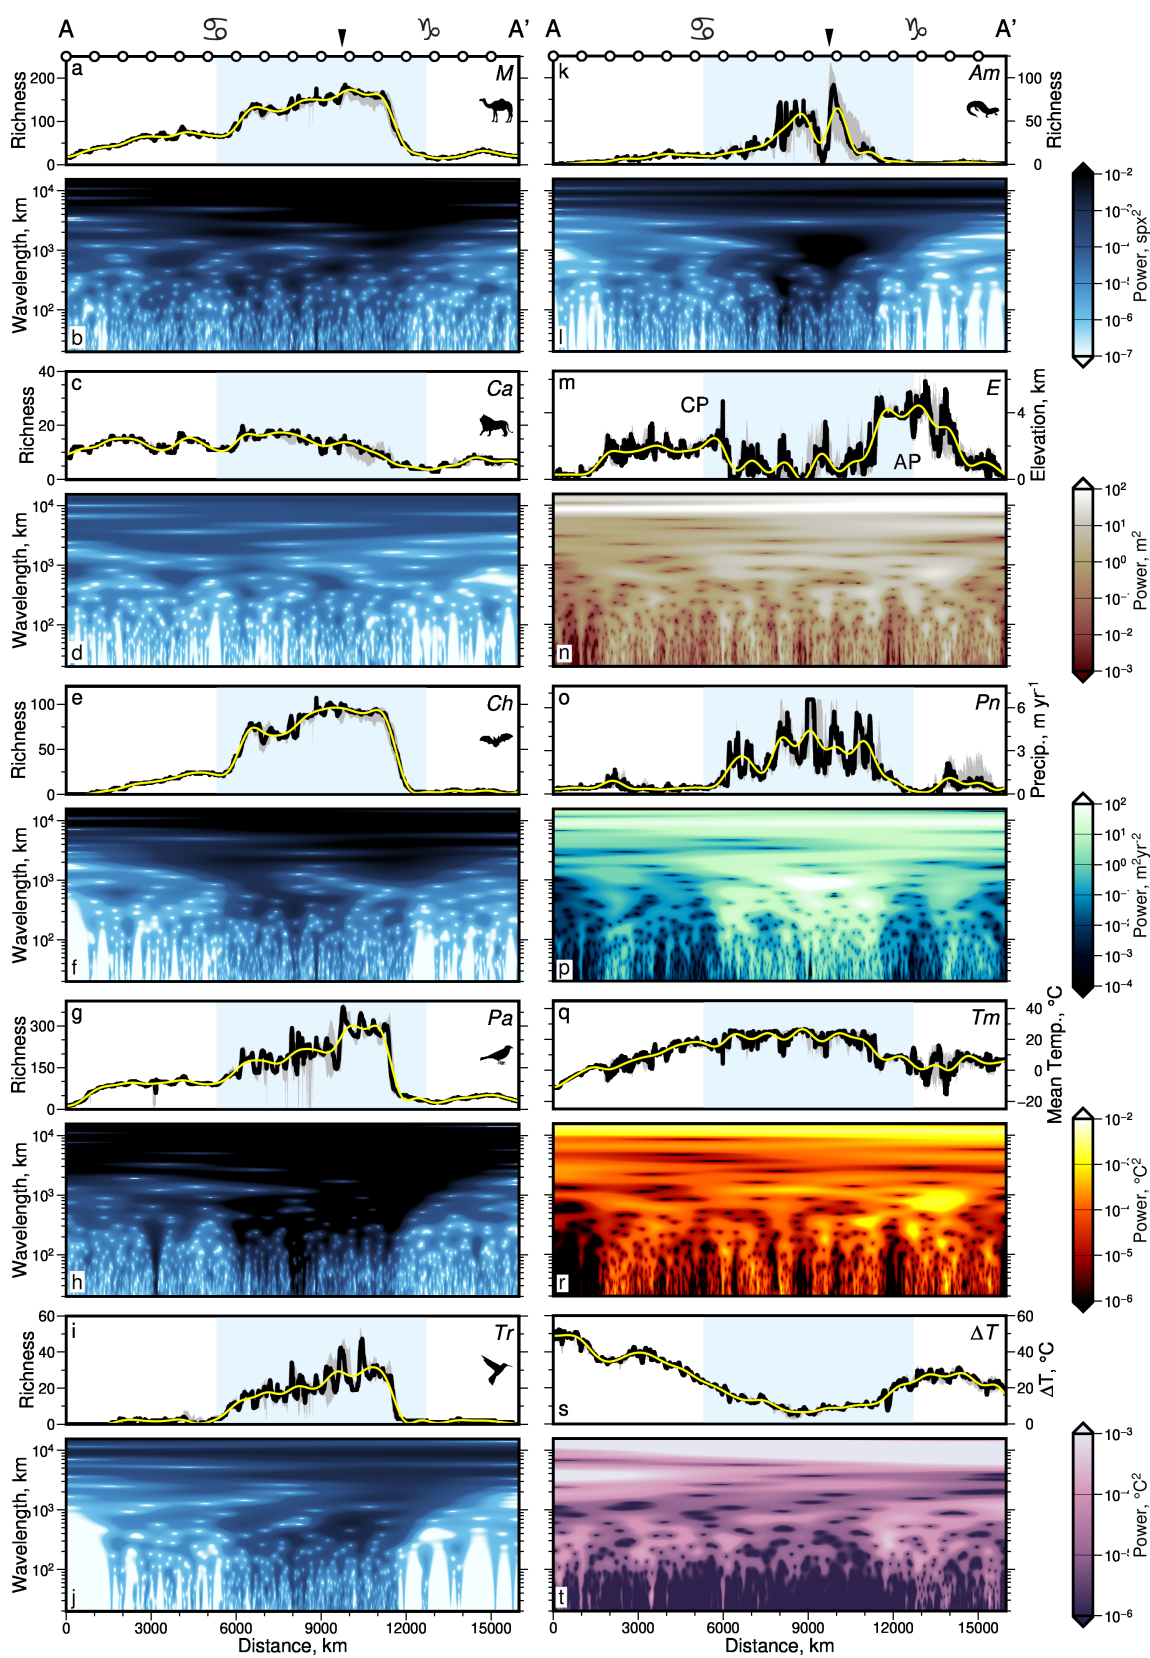

Figure 2

**Figure 2 (preceding page): Wavelet transforms of species richness and environment.** (a) Black line = species richness of Mammalia ( $M$ ) along transect A—A'; gray bands = 100 km wide swaths centred on A—A'; blue bands = tropical latitudes; white circles are shown every 1000 km, see transect A—A' in Figure 1; black arrow and symbols above top axis = Equator and tropics as in Figure 1. Yellow line = inverse wavelet transform of signal, filtering to pass only wavelengths  $> 1000$  km; mean difference to input signal =  $3.0 \pm 3.3$  ( $1\sigma$ ) spx. (b) Continuous wavelet transform of mammal richness spatial series (black line in panel a). Colors = rectified spectral power as a function of location and scale (wavelength); spx = species per pixel. (c)–(t) As (a)–(b) but for Carnivora ( $Ca$ ), Chiroptera ( $Ch$ ), Passeriformes ( $Pa$ ), Trochilidae ( $Tr$ ), Amphibia ( $Am$ ), elevation ( $E$ ), mean annual precipitation rate ( $Pn$ ), temperature ( $Tm$ ) and temperature range ( $\Delta T$ ) along transect A—A' (Amante & Eakins, 2009; Jenkins *et al.*, 2013; Karger *et al.*, 2017). Mean differences between signals and inverse transforms filtered to remove wavelengths  $< 1000$  km =  $0.7 \pm 0.6$  spx ( $Ca$ ),  $1.5 \pm 2.1$  spx ( $Ch$ ),  $11.6 \pm 16.7$  spx ( $Pa$ ),  $1.5 \pm 2.5$  spx ( $Tr$ ),  $2.9 \pm 5.3$  spx ( $Am$ ),  $0.36 \pm 0.3$  km ( $E$ ),  $0.35^{+0.5}_{-0.35}$  m/yr ( $Pn$ ),  $2.2 \pm 2.2$  °C ( $Tm$ ), and  $1.2 \pm 1.1$  °C ( $\Delta T$ ). See Supporting Information for results for transects B—B', C—C', D—D' and average global latitudinal transect. Note high spectral power concentrated at wavelengths  $> 10^3$  km for all series. High species richness power (darker patches) at shorter wavelengths tends to be concentrated within the tropics.

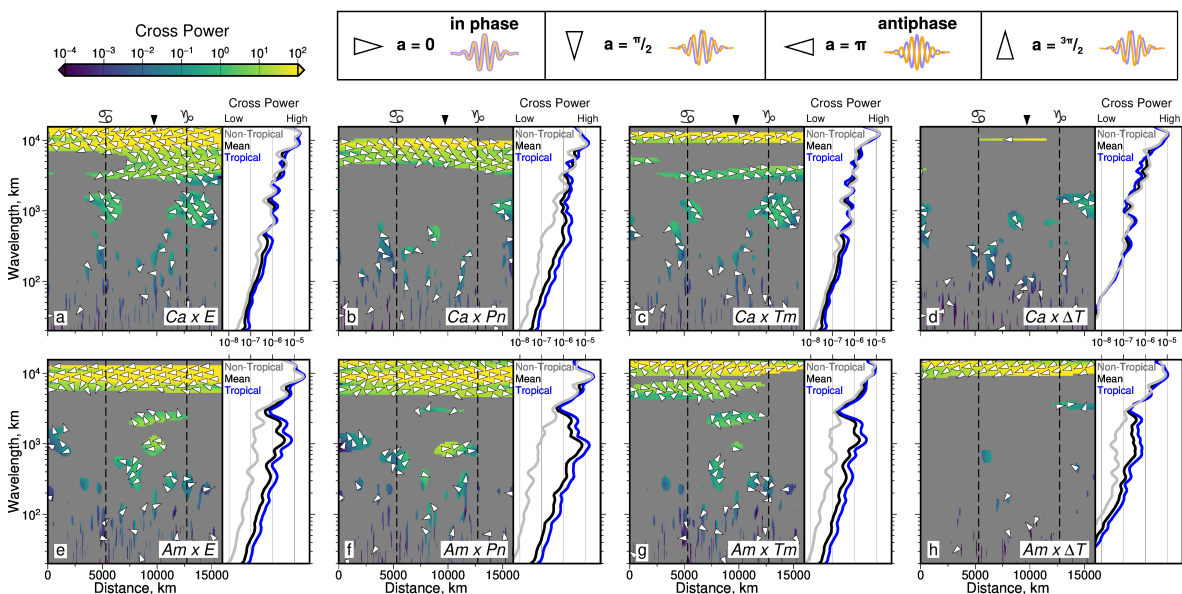

**Figure 3: Coherence, cross power, and phase difference between species richness and environmental variables.** (a) Comparison of Carnivora ( $Ca$ ) and elevation ( $E$ ) as a function of location and scale along transect A—A' (Figures 1–2). Colors = cross wavelet power; yellow = co-located large (positive or negative) amplitude signals. Gray masks regions with coherence below 90% significance level (see body text, Materials and Methods). Arrows = phase difference between spatial series: right/left pointing = in-phase/anti-phase (see guide above panels b–d). Black arrow and symbols above plot = Equator and tropics, as in Figure 1. Side panel: black/blue/gray lines = distance-averaged cross wavelet power of all/tropical/non-tropical latitudes (see Figure 2). High cross power = large co-located amplitudes in the two spatial series. (b)–(d) Comparison of Carnivora and mean annual precipitation rate ( $Pn$ ), temperature ( $Tm$ ) and annual temperature range ( $\Delta T$ ). (e)–(h) Comparison of amphibian species richness and same environmental variables as panels a–d. Statistically significant coherence is concentrated at wavelengths  $> 10^3$  km, where species tend to be in- or anti-phase with environmental variables. The least statistically significant coherence is for Carnivora and temperature range (note gray mask across most of panel d).

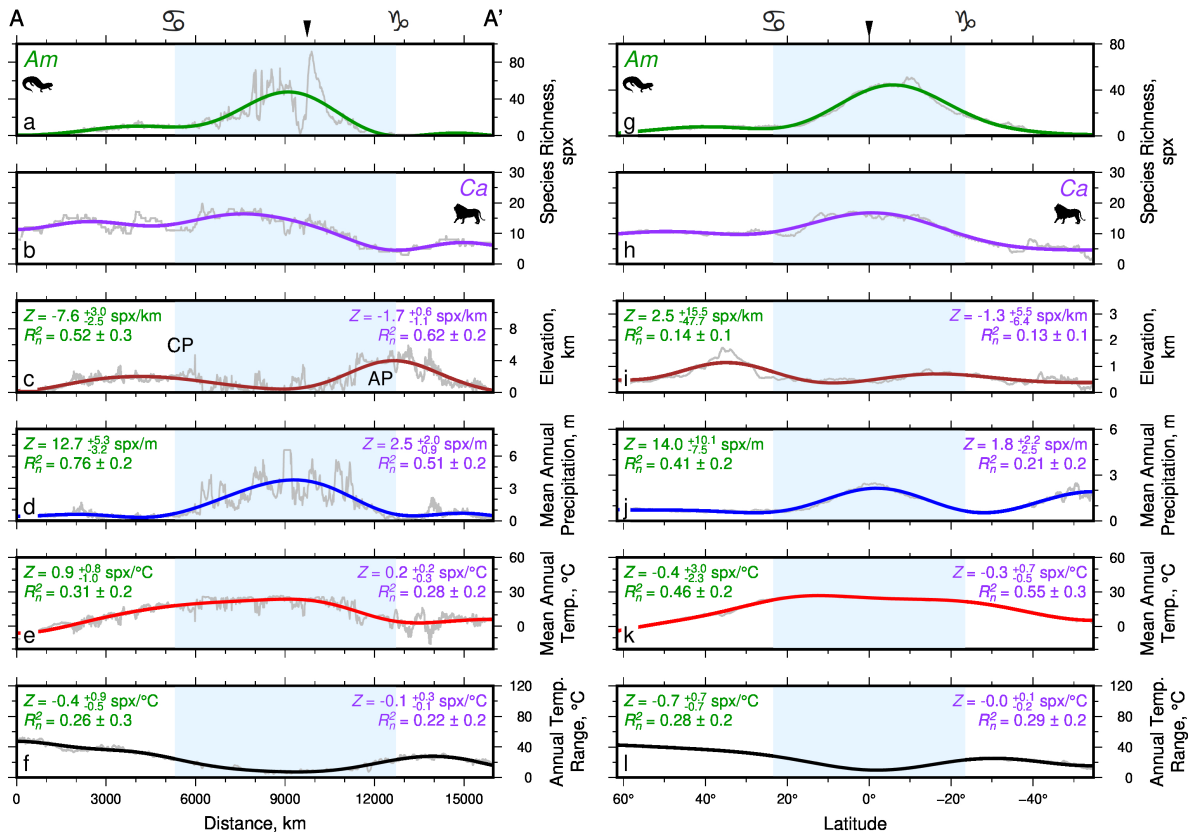

**Figure 4: Summary of coherence between species richness and environmental variables at large scales.** (a-f) Species richness and environmental variables along Americas transect A—A' (see Figures 1–2). Blue band = tropical latitudes; black arrow = Equator; symbols above  $x$  axis = Tropics of Cancer and Capricorn. (a) Amphibian species richness. Gray = full-resolution observed species richness trend (see Figure 2k). Green = inverse wavelet transform showing filtered amphibian species richness at wavelengths  $\geq 3756$  km (i.e. one quarter of transect length scale). Mean difference between gray and green lines = 4.4 spx. (b) As (a) but for carnivoran species richness. Mean difference between gray and green lines = 1.2 spx. (c)–(f) As (a)–(b) but for elevation, mean annual precipitation, mean temperature, and annual temperature range, respectively.  $Z$ ,  $R_n^2$  = mean admittance and coherence, respectively, between species richness and given environmental variable. Green text = admittance for amphibian species richness; purple text = admittance for carnivoran species richness. (g)–(l) As (a)–(f) but for mean global latitudinal transects.
